# Supplementary material for: Rh-Catalyzed Cascade C-H Activation/Annulation of N-Hydroxybenzamides and Propargylic Acetates for Modular Access to Isoquinolones
Source: MDPI journal article supplement (doi:10.3390/molecules27238553), 2022-12-05
Supplement: s1 [file s1]

## *Supporting Information*

# **Rh-Catalyzed Cascade C-H Activation/Annulation of *N*-Hydroxybenzamides and Propargylic Acetates for Modular Access to Isoquinolones**

Taibei Fang <sup>1,†</sup>, Shiwen Zhang <sup>1,†</sup>, Qingqing Ye <sup>2,\*</sup>, Shuwen Kong <sup>1</sup>, Tingting Yang <sup>1</sup>, Kaijie Tang <sup>1</sup>, Xinwei He <sup>1,\*</sup> and Yongjia Shang <sup>1,\*</sup>

<sup>1</sup> Key Laboratory of Functional Molecular Solids, Ministry of Education, Anhui Laboratory of Molecule-Based Materials (State Key Laboratory Cultivation Base), College of Chemistry and Materials Science, Anhui Normal University, Wuhu 241000, China

<sup>2</sup> Department of Medicine, Chuzhou City Vocation College, Chuzhou 239000, China

\* Correspondence: yeqingqing1983@sohu.com (Q.Y.); xinweihe@mail.ahnu.edu.cn (X.H.); shyj@mail.ahnu.edu.cn (Y.S.)

† These authors contributed equally to this work.

### **Table of contents**

|                                                                           |        |
|---------------------------------------------------------------------------|--------|
| 1. <sup>1</sup> H and <sup>13</sup> C NMR spectrum for all compounds----- | S2-S34 |
| 2. X-ray crystal data of compound <b>3aa</b> -----                        | S35    |

# 1. $^1\text{H}$ and $^{13}\text{C}$ NMR spectrum for all compounds

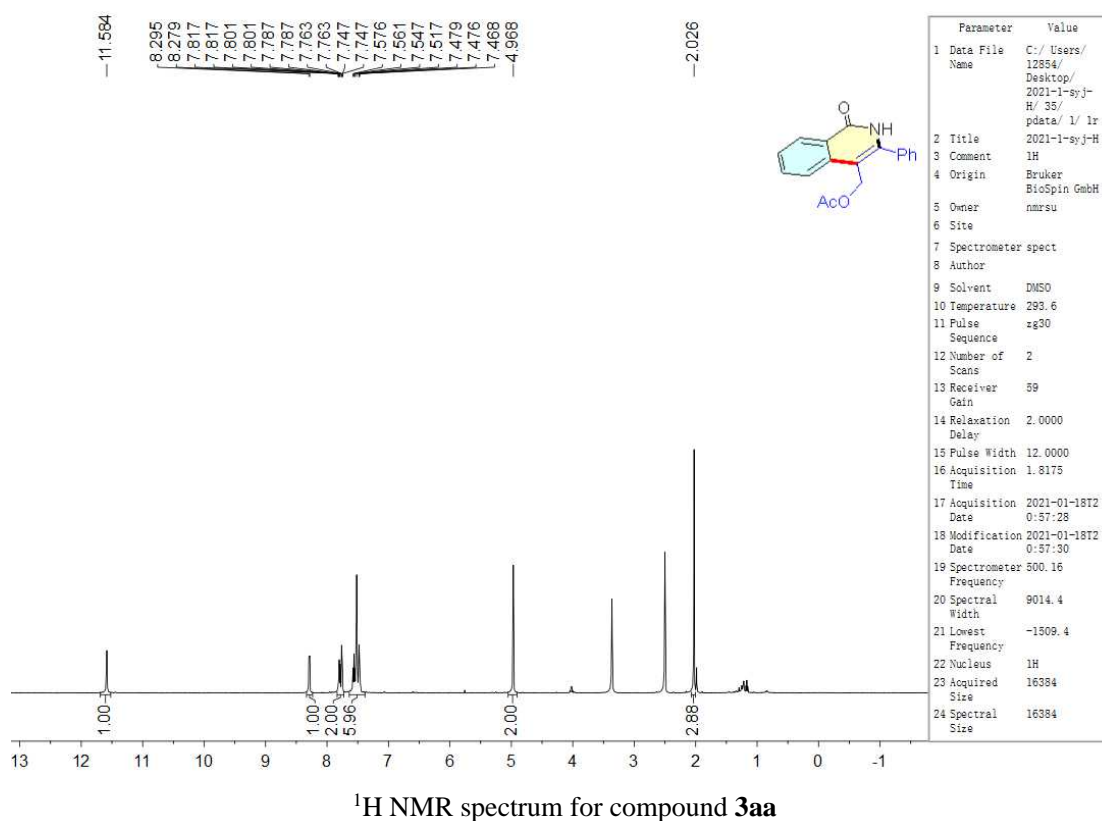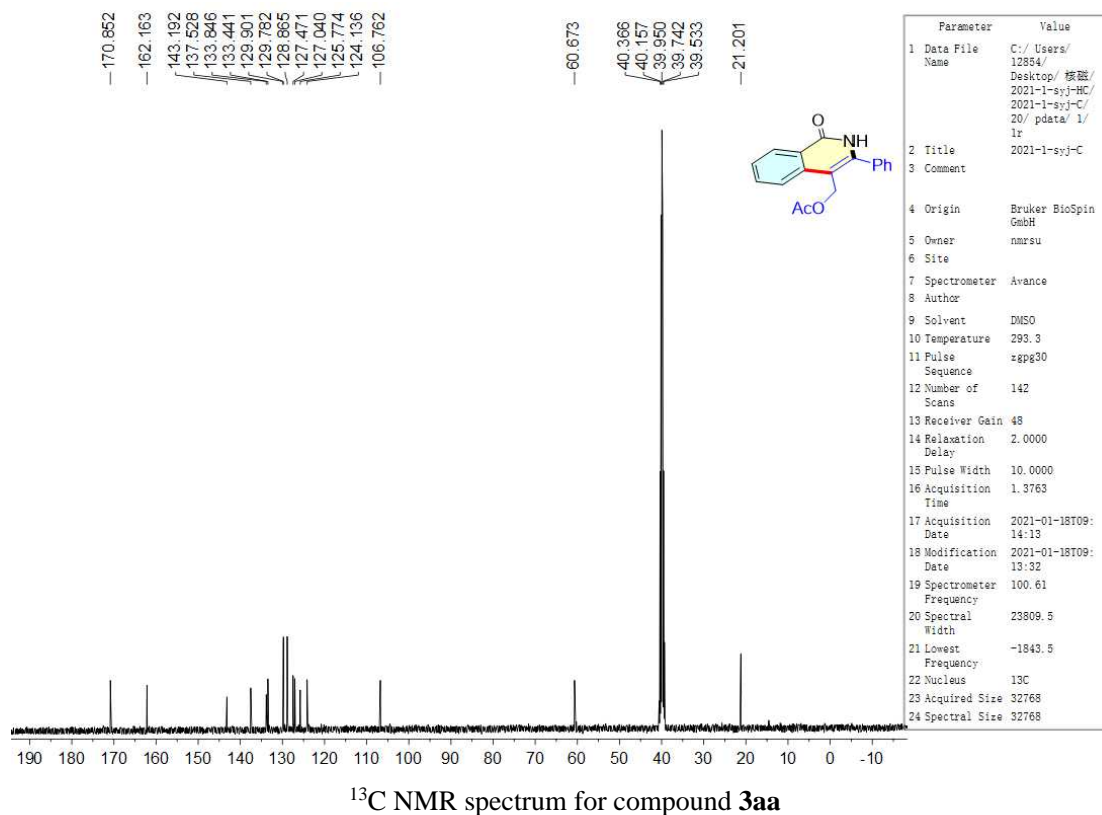

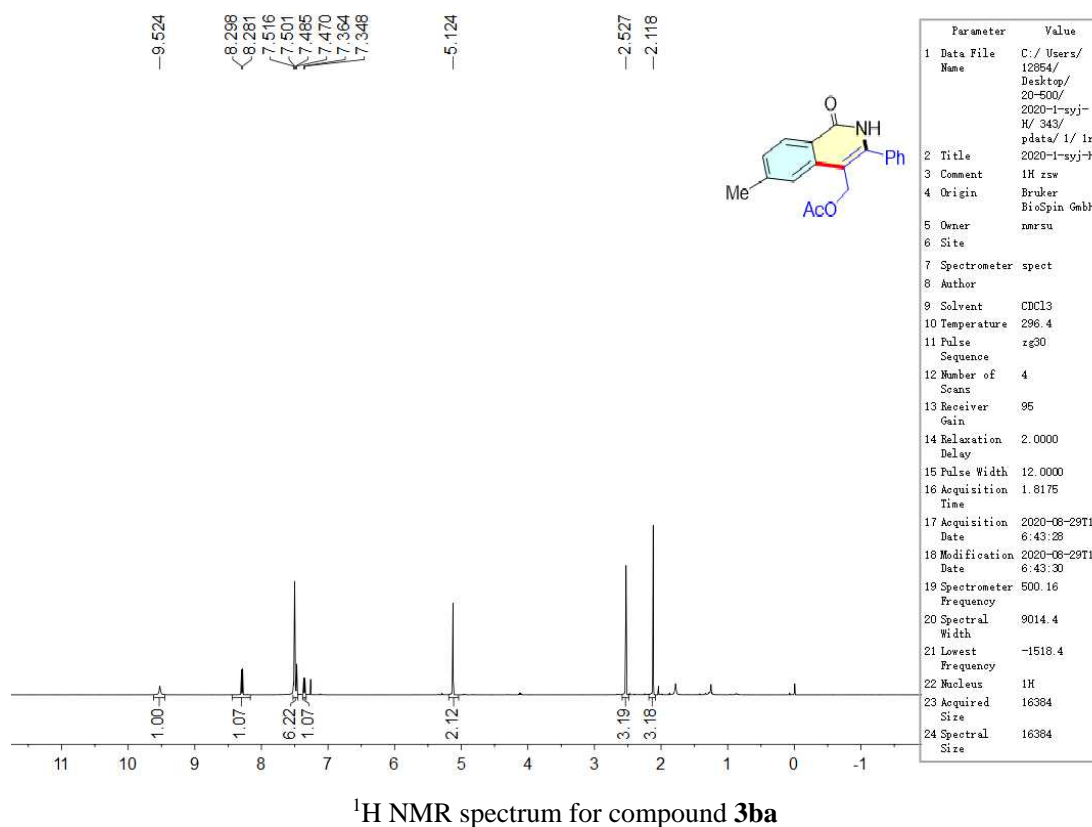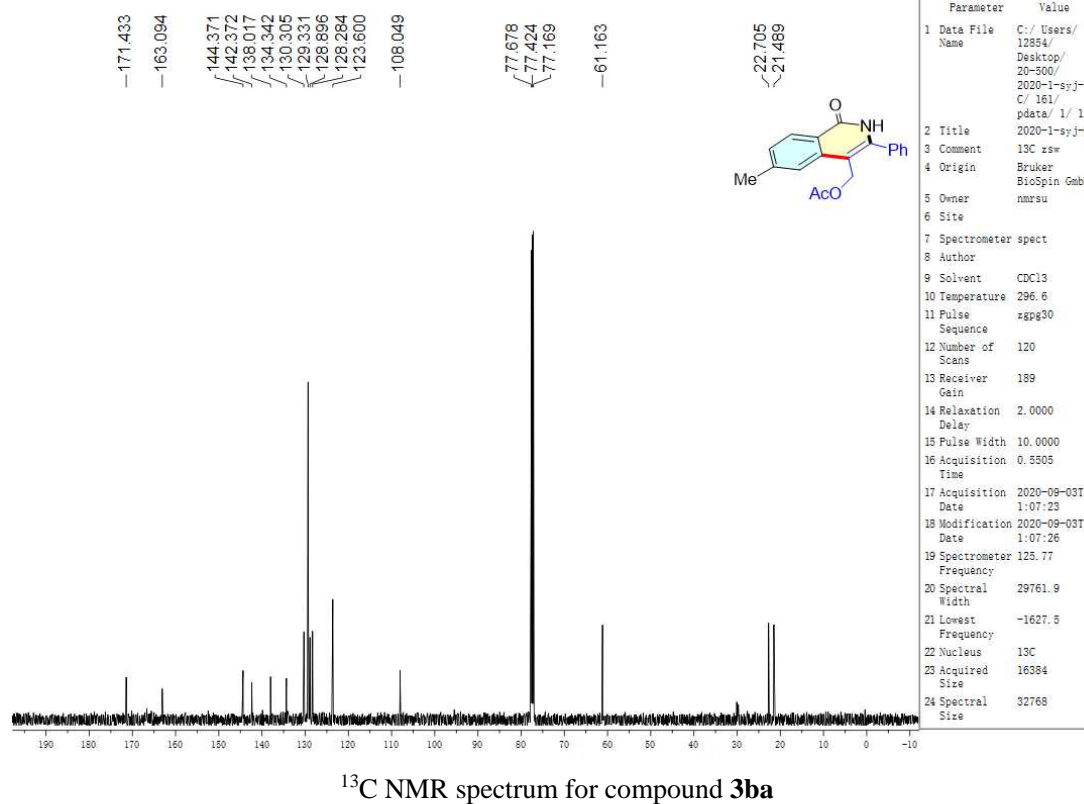

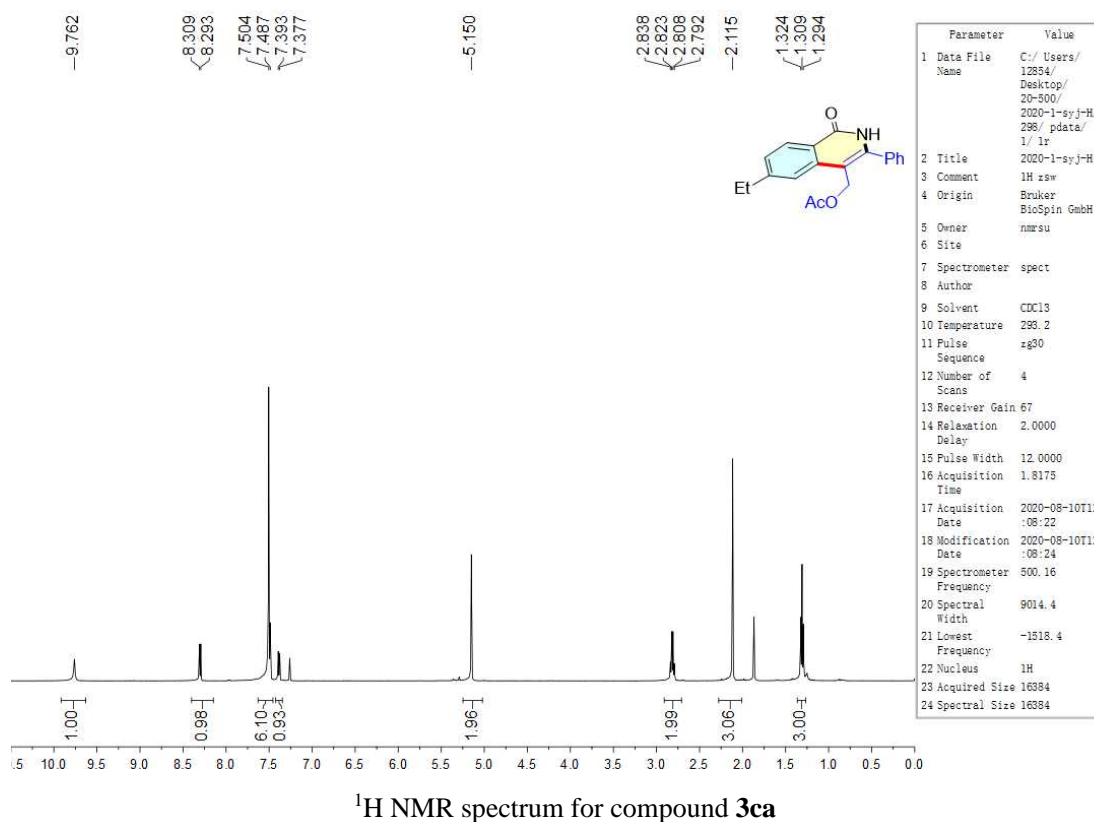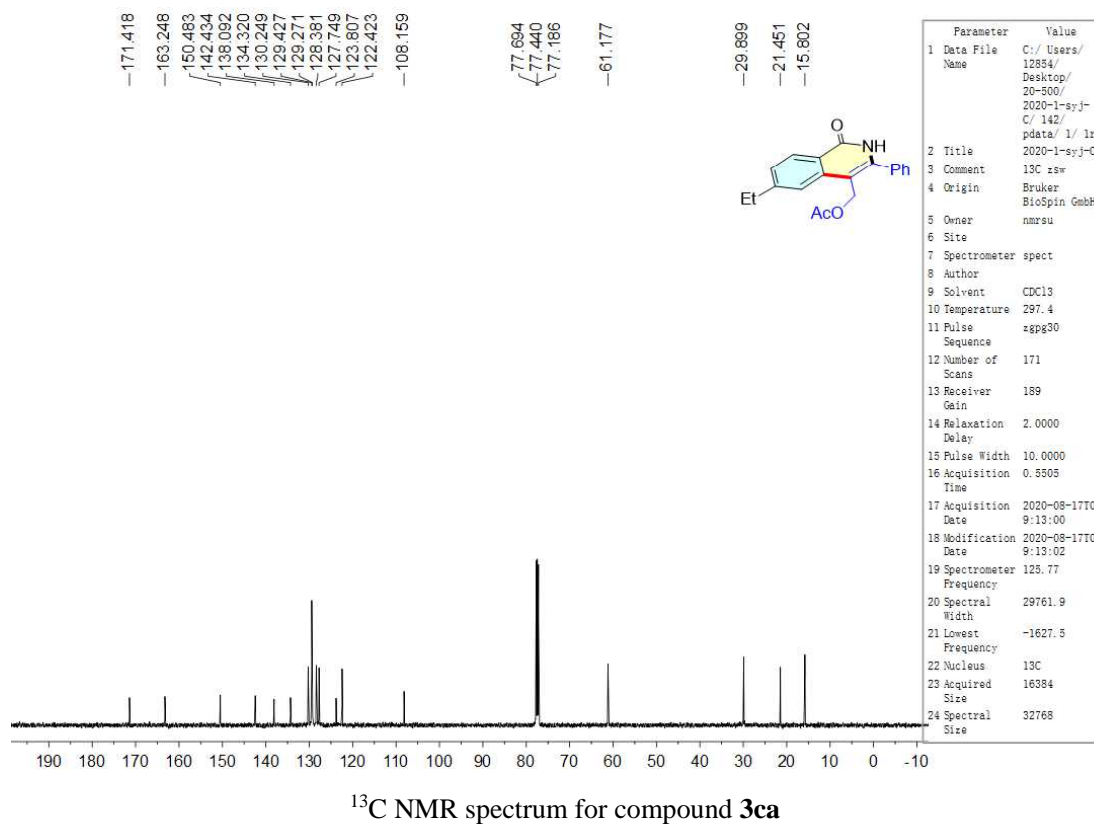

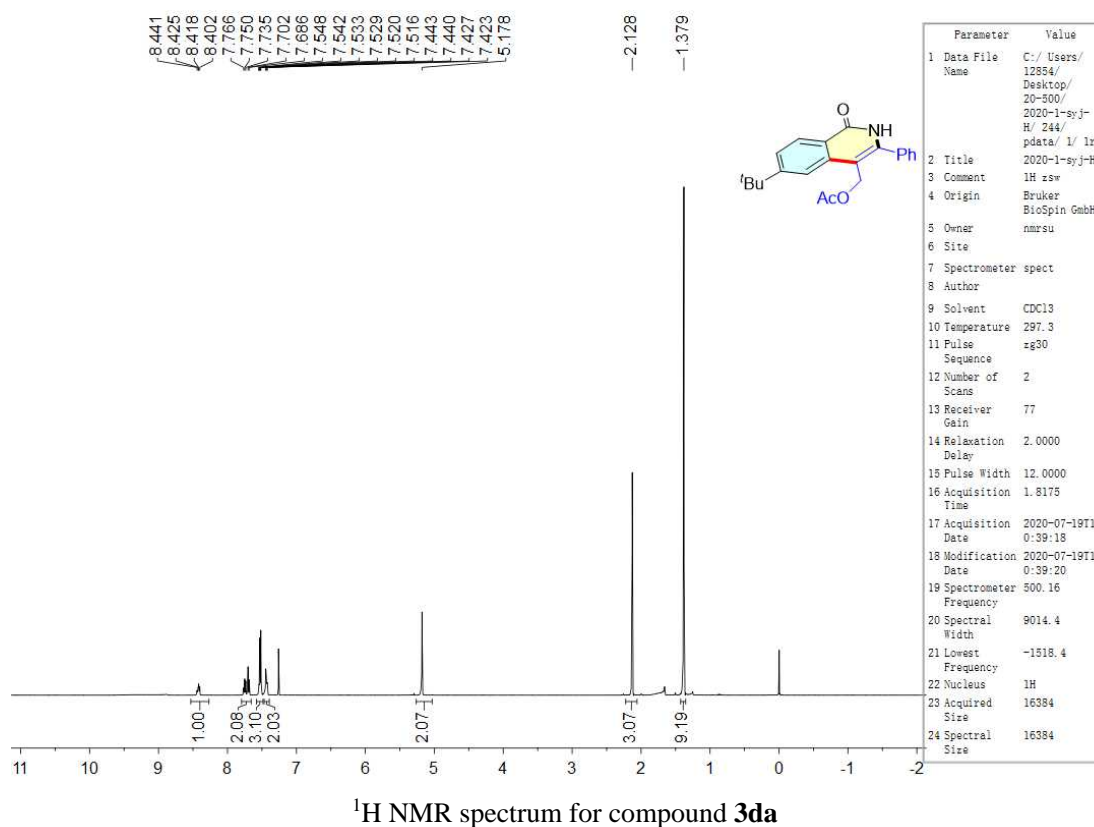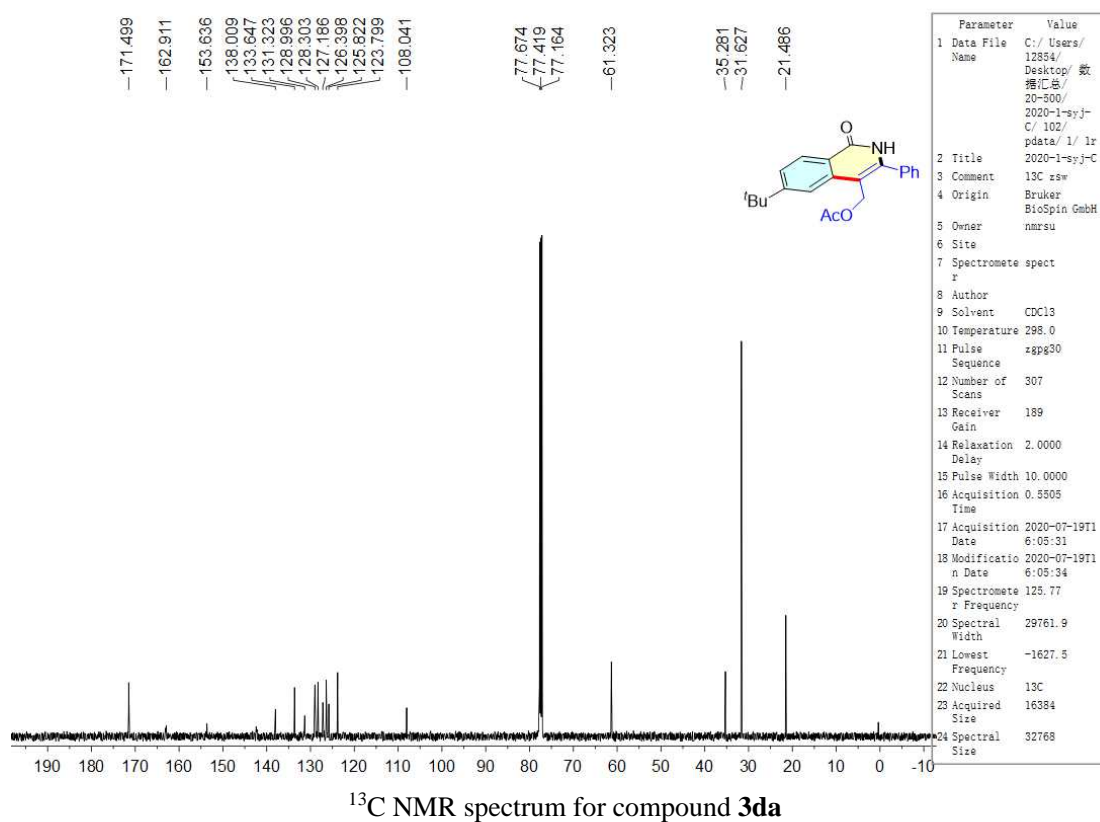

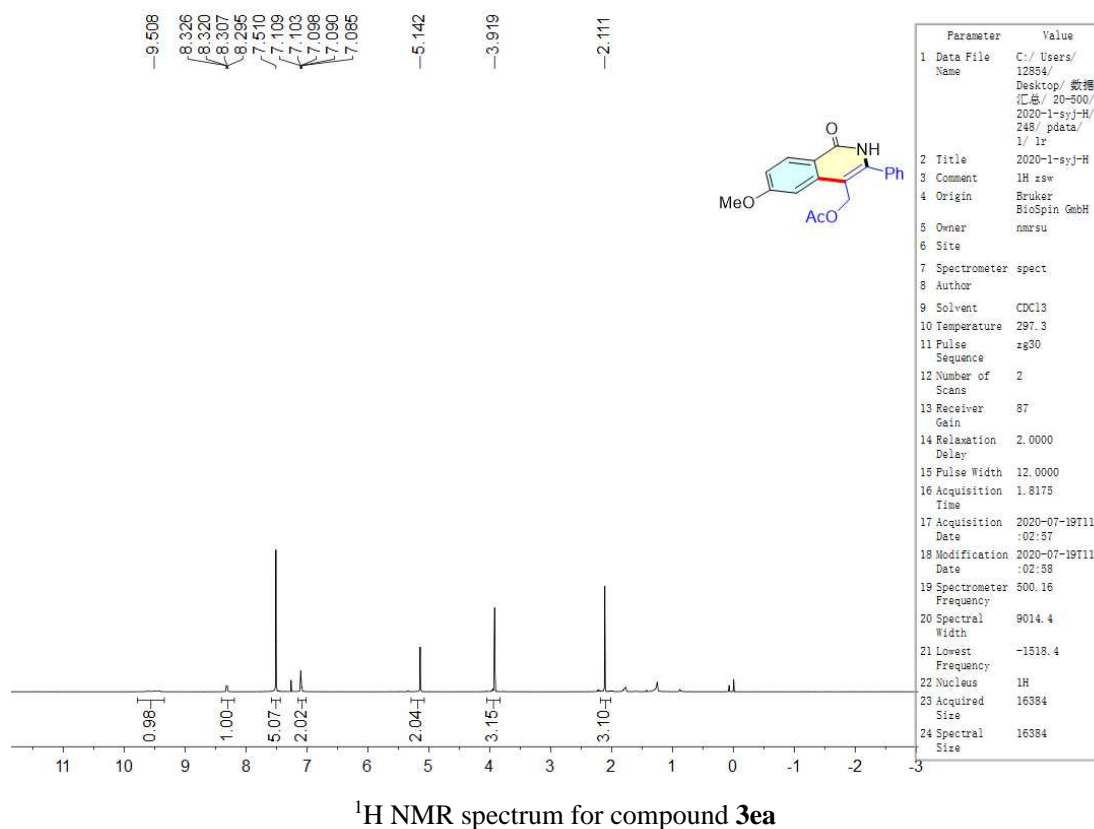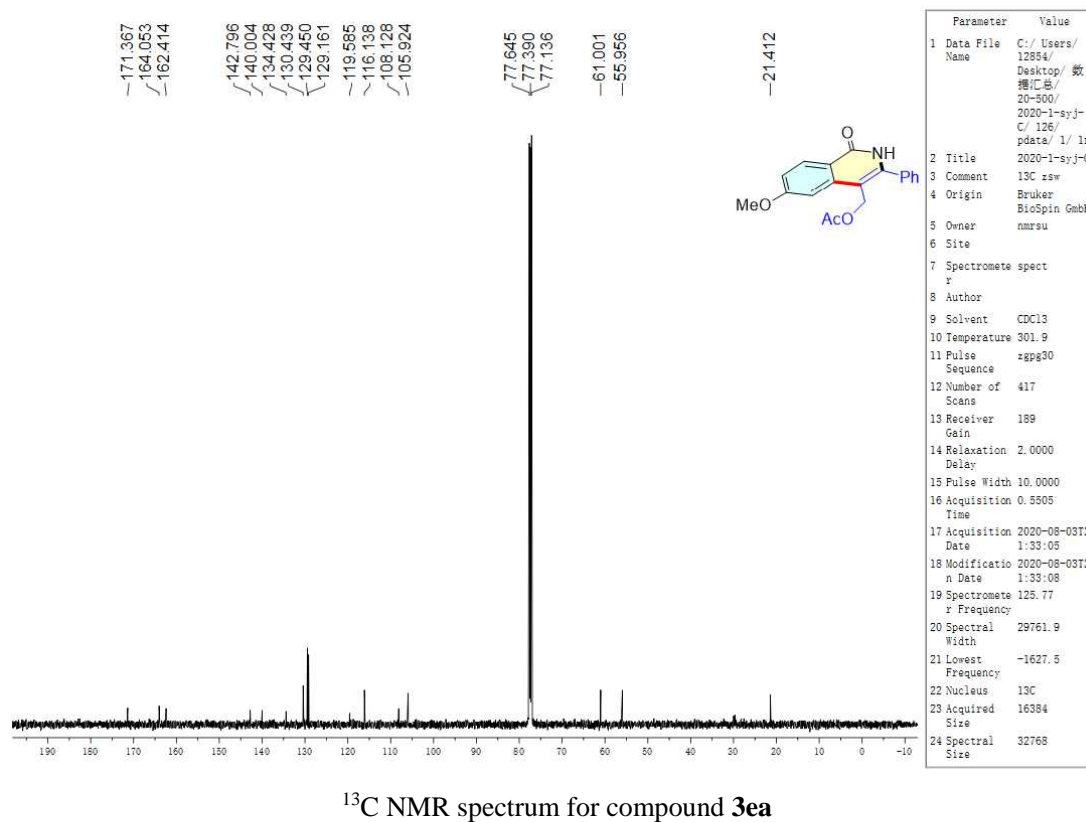

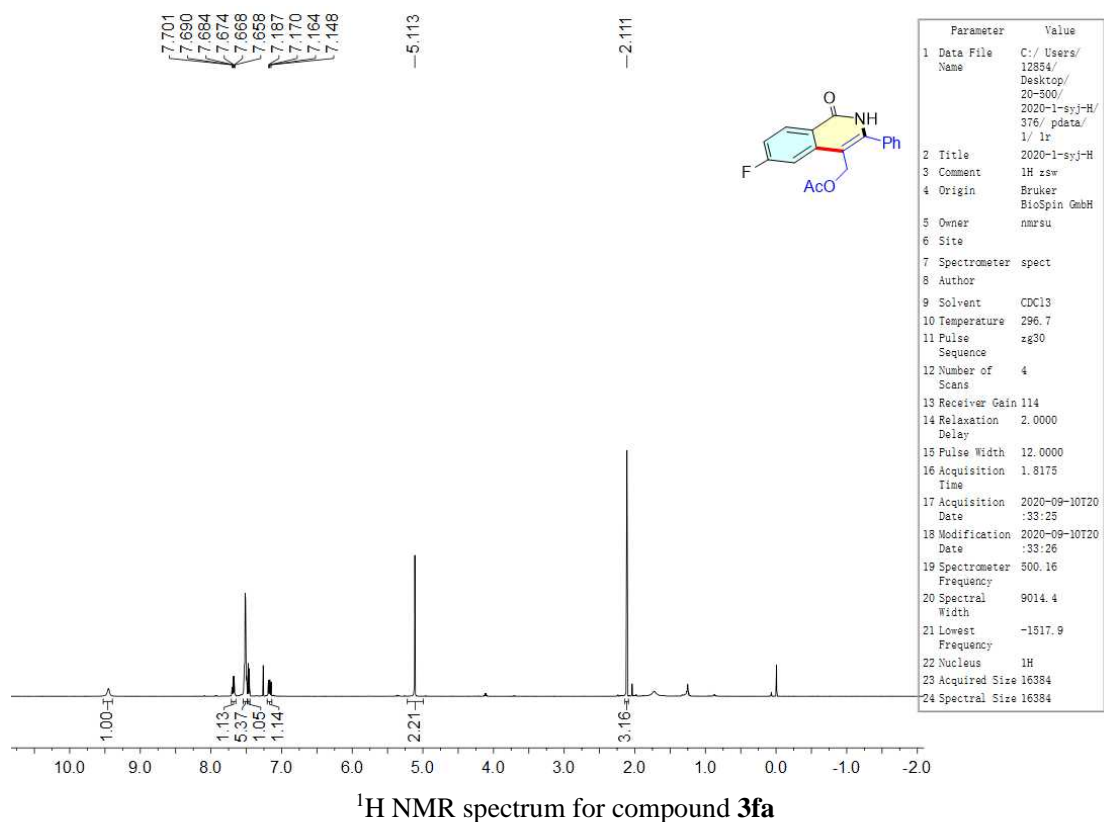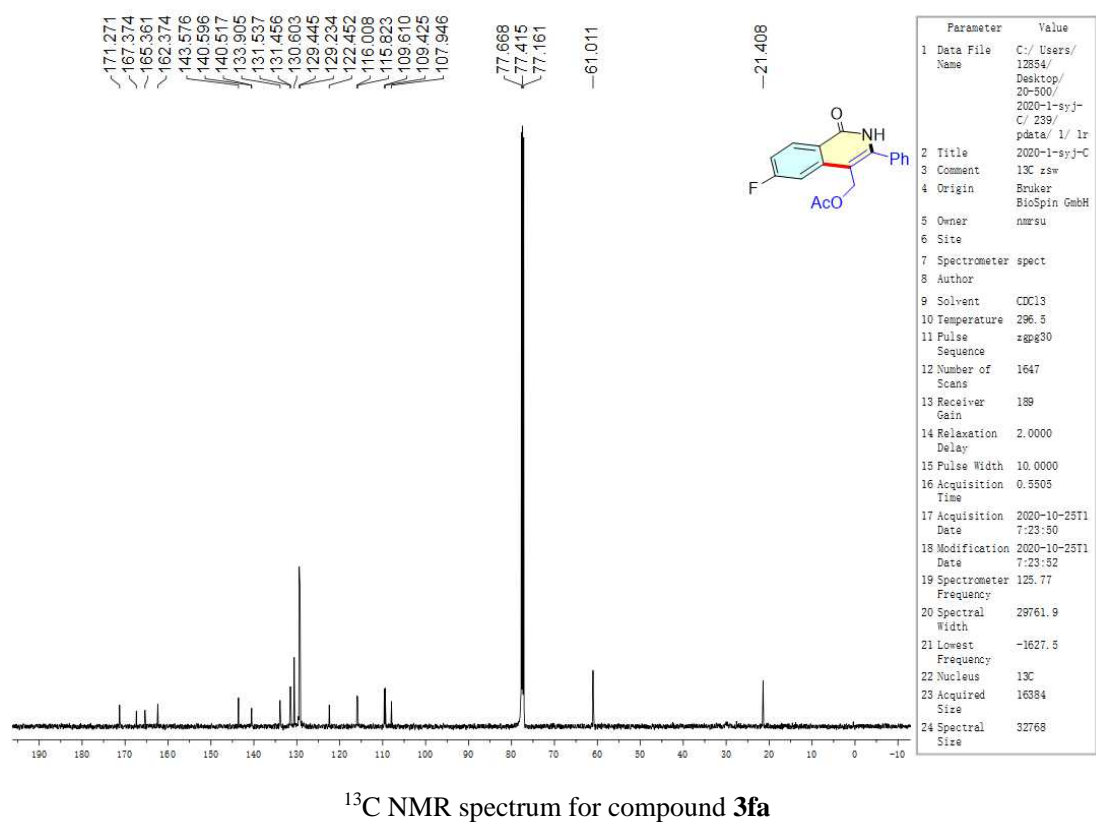

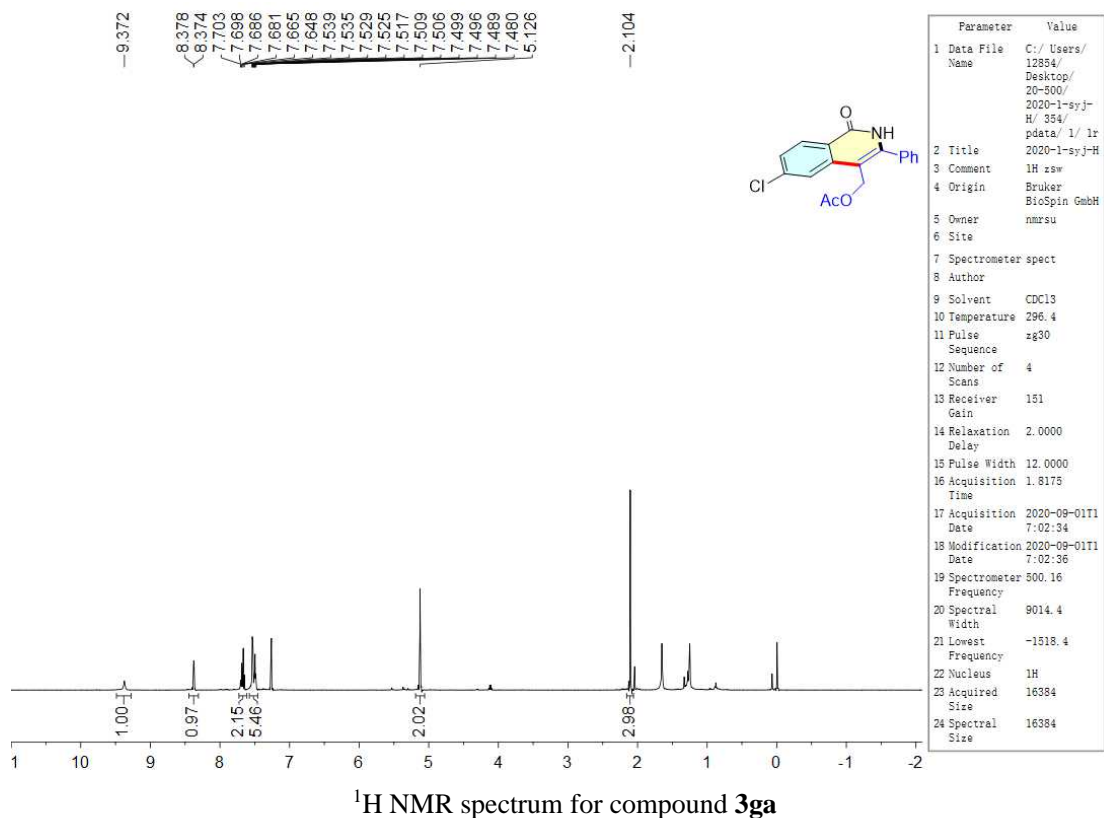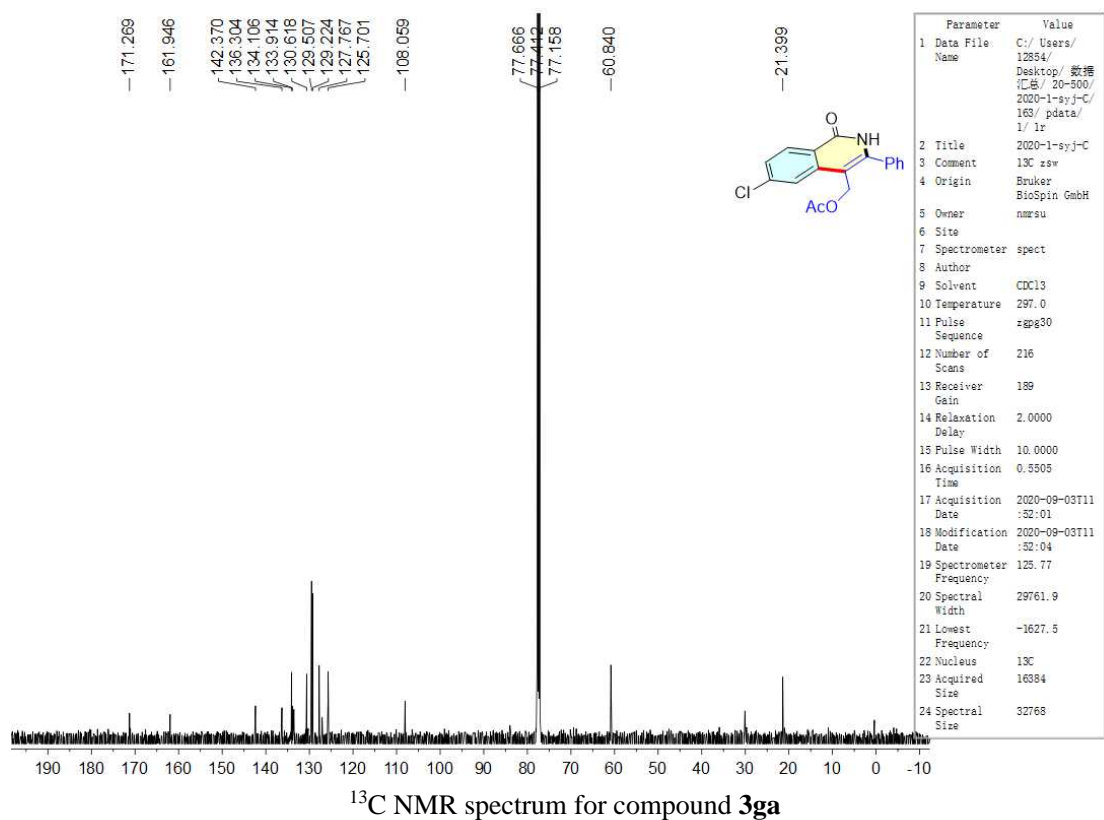



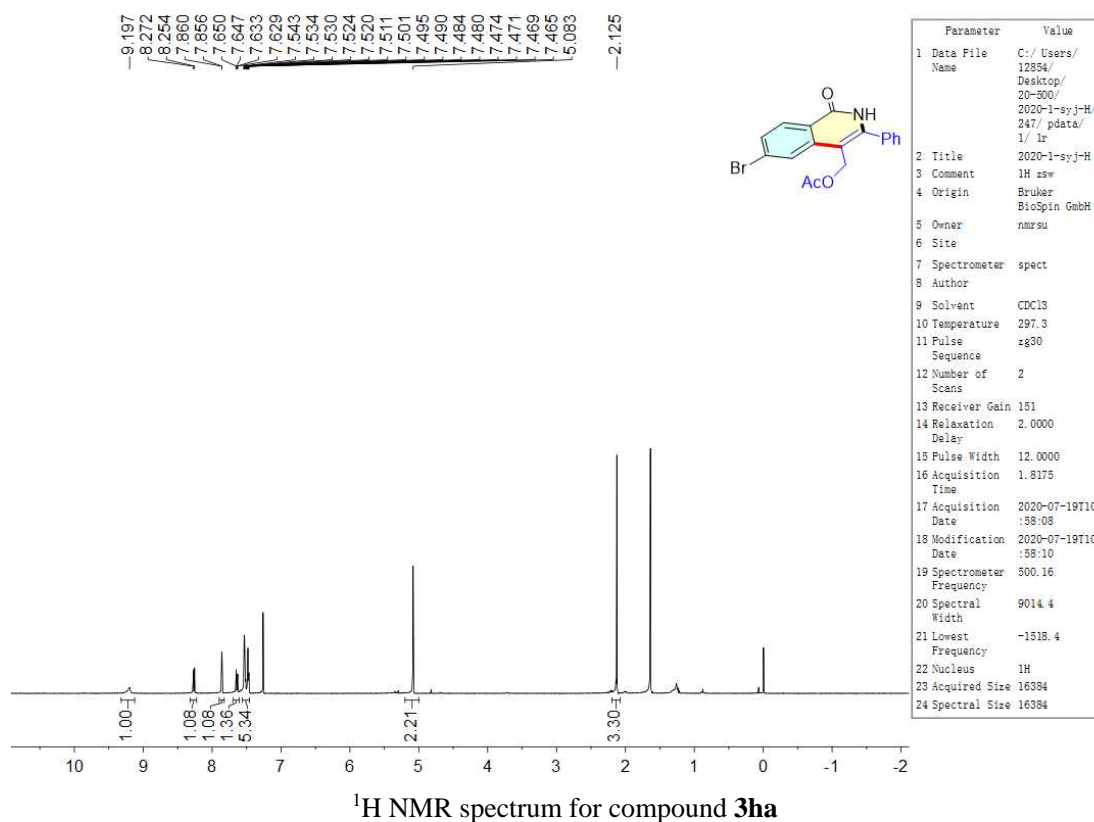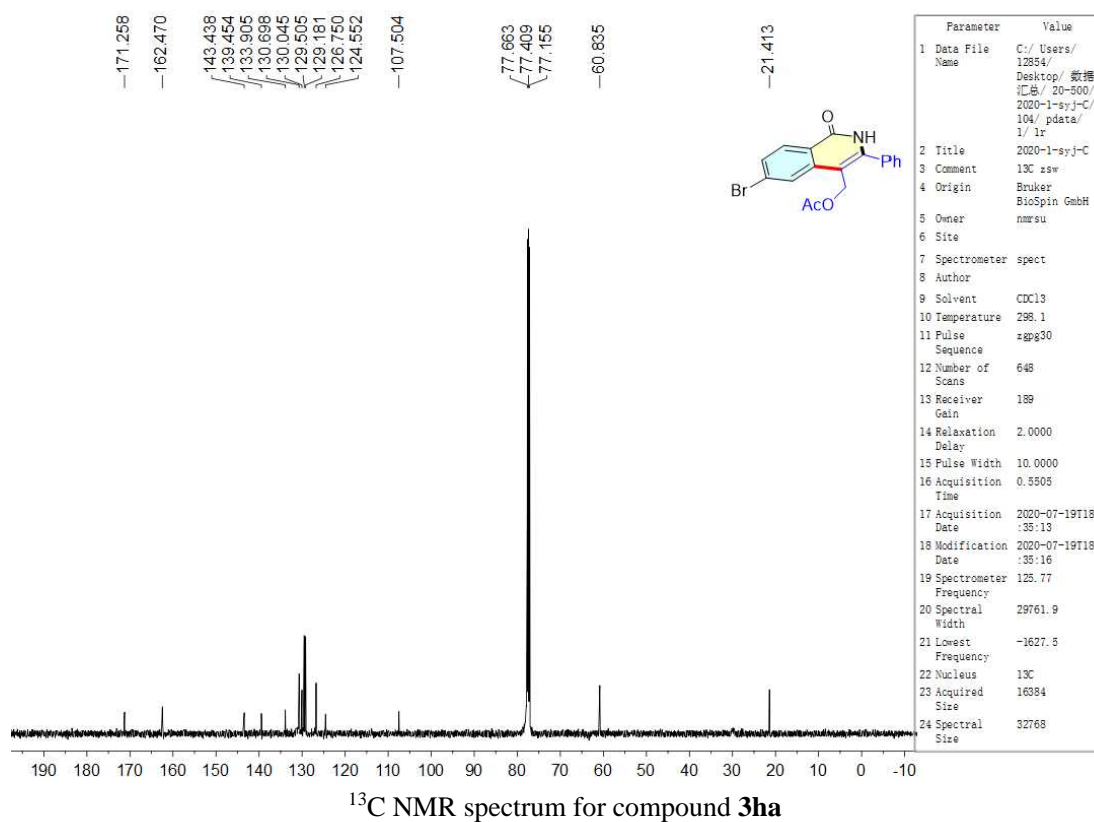

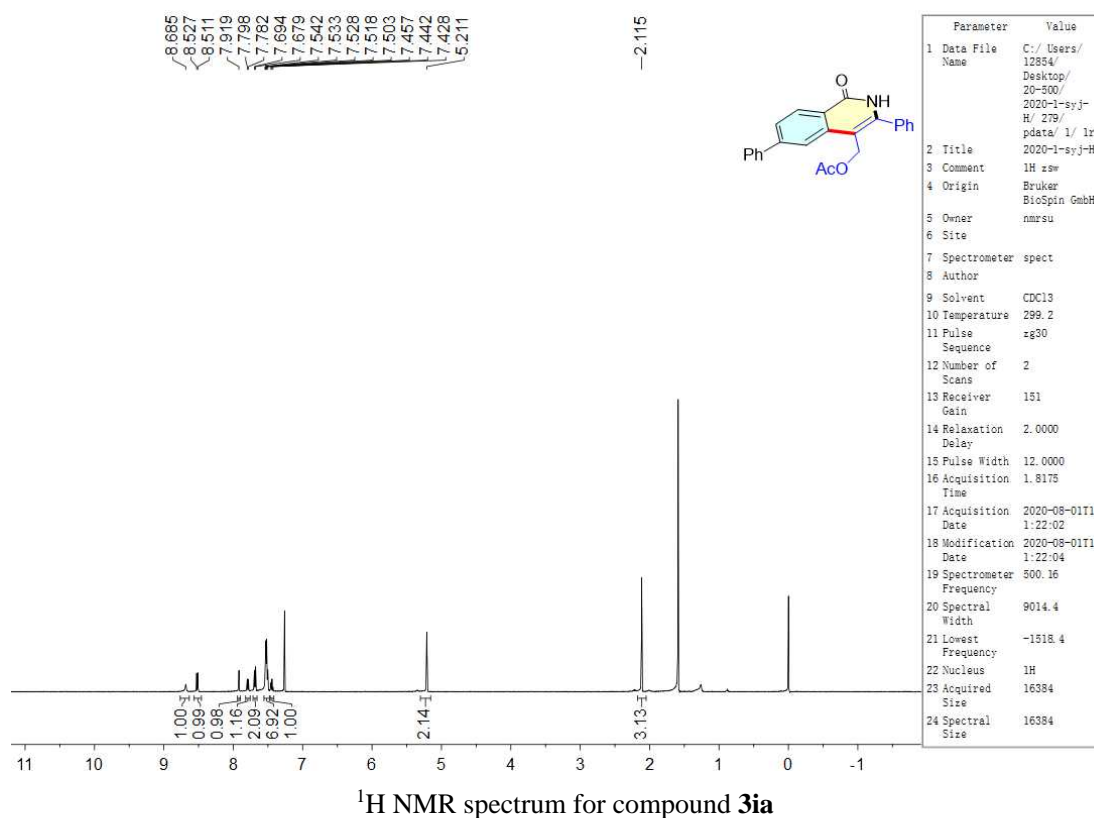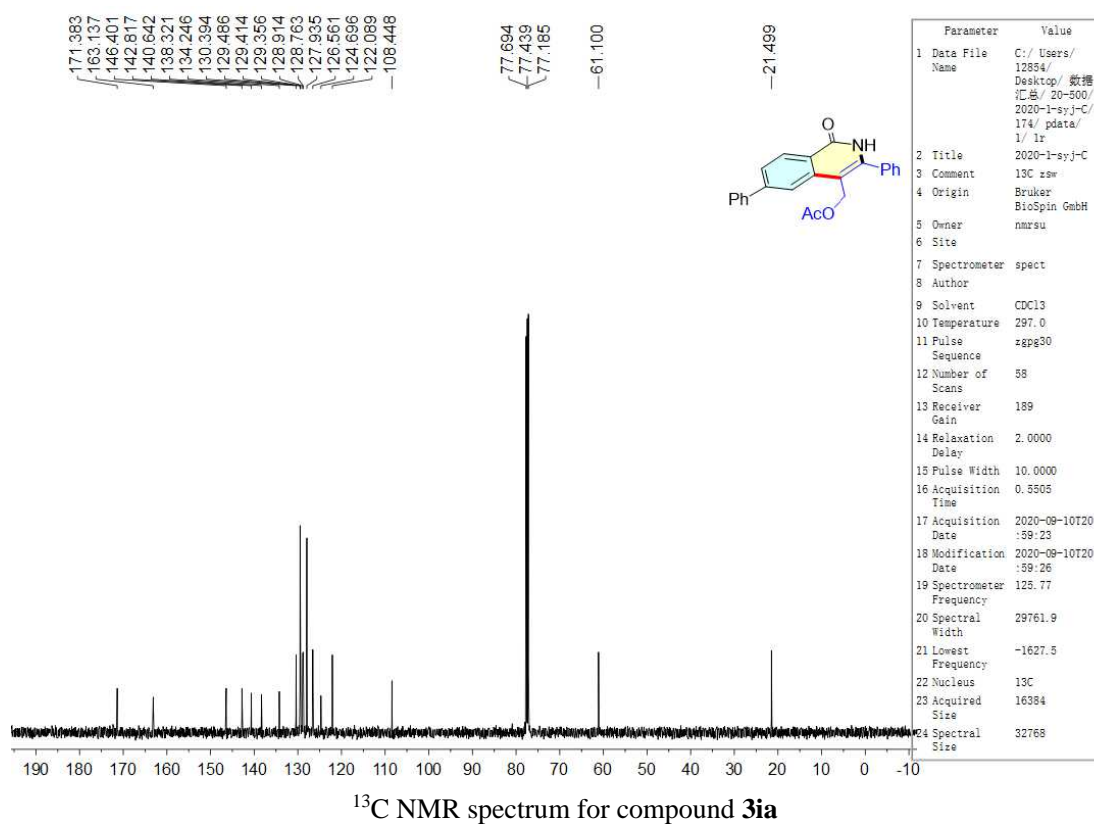

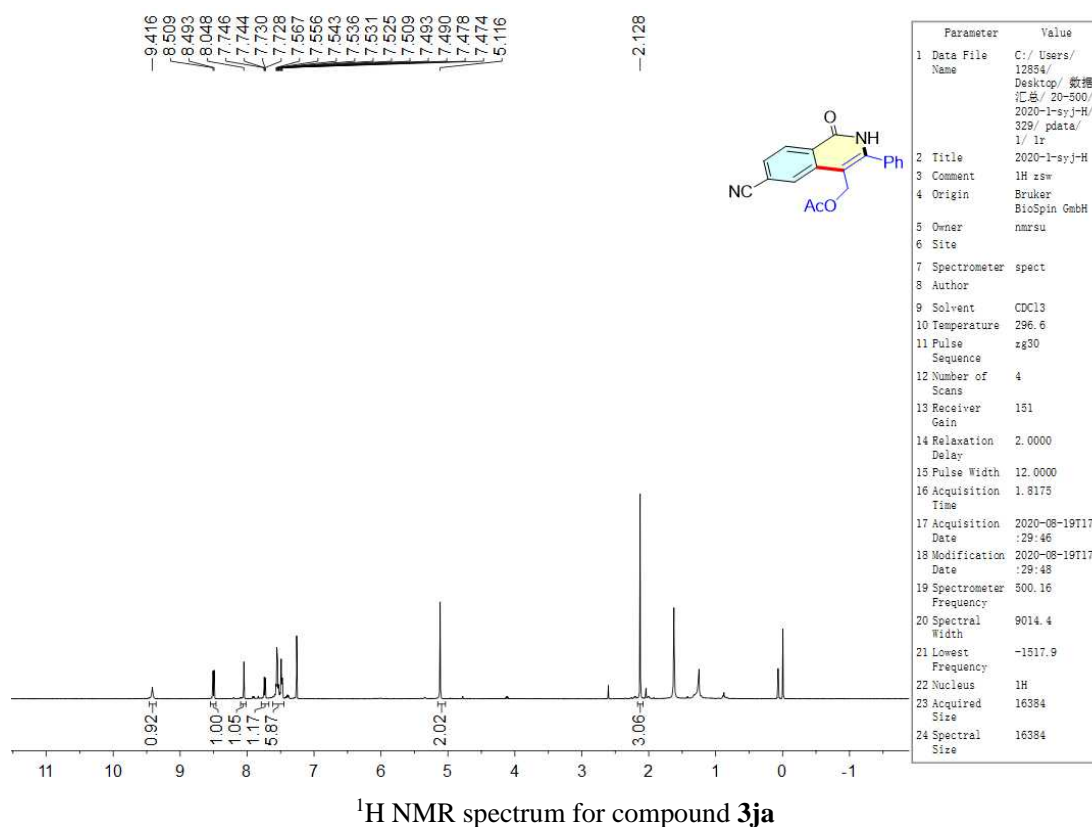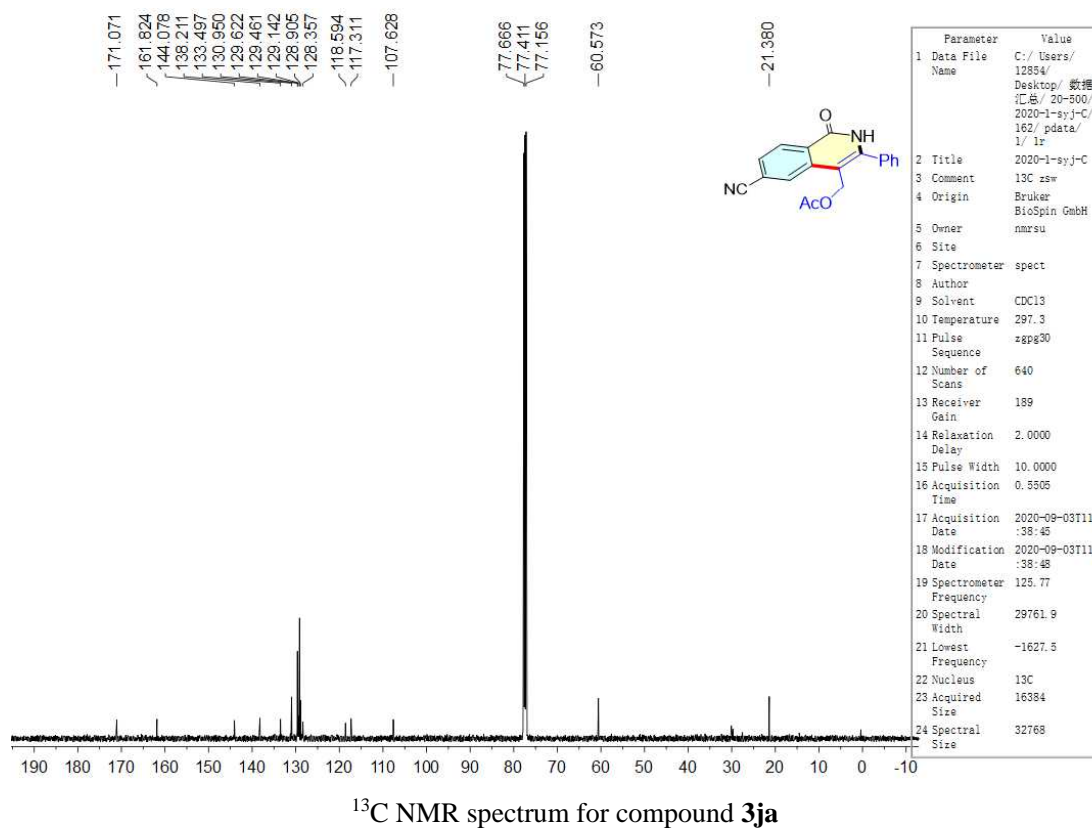

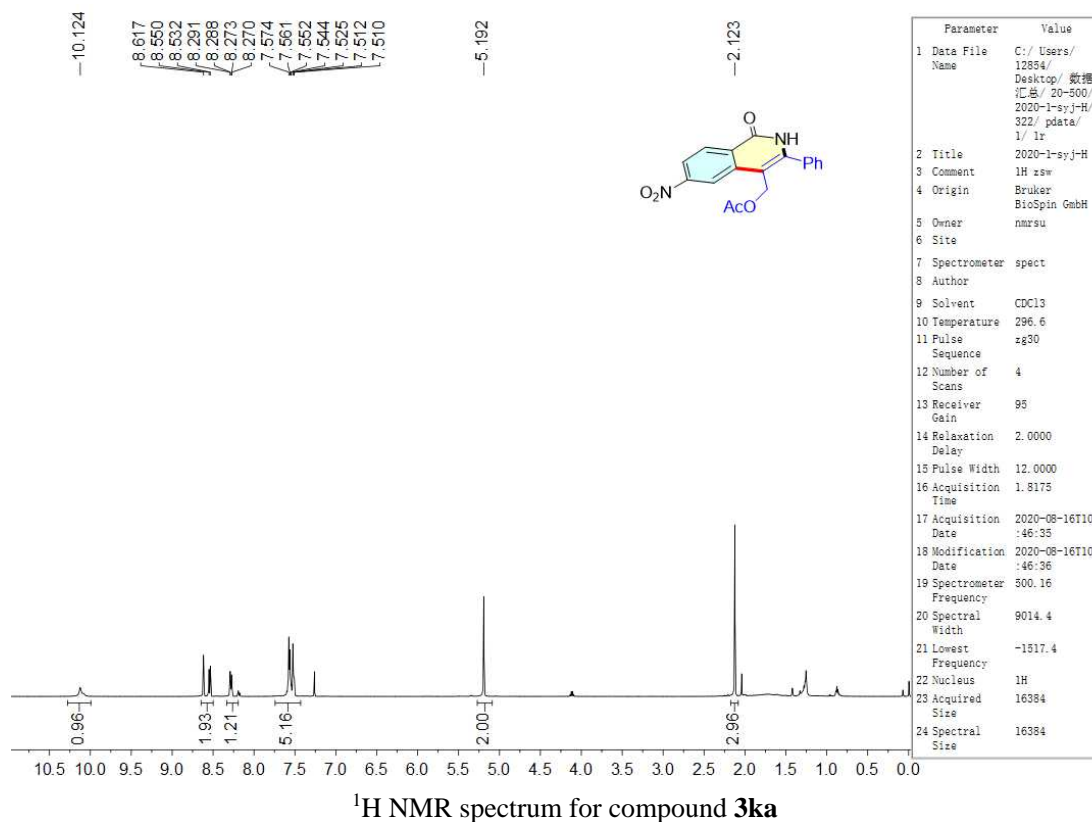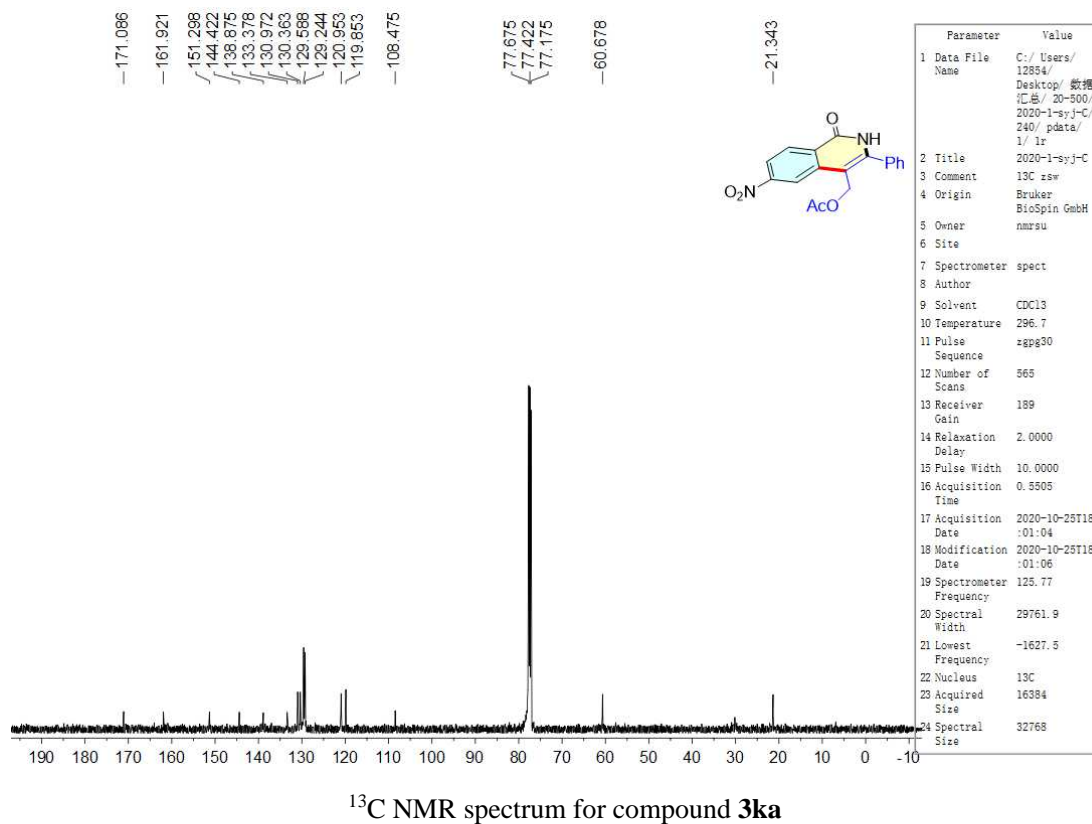

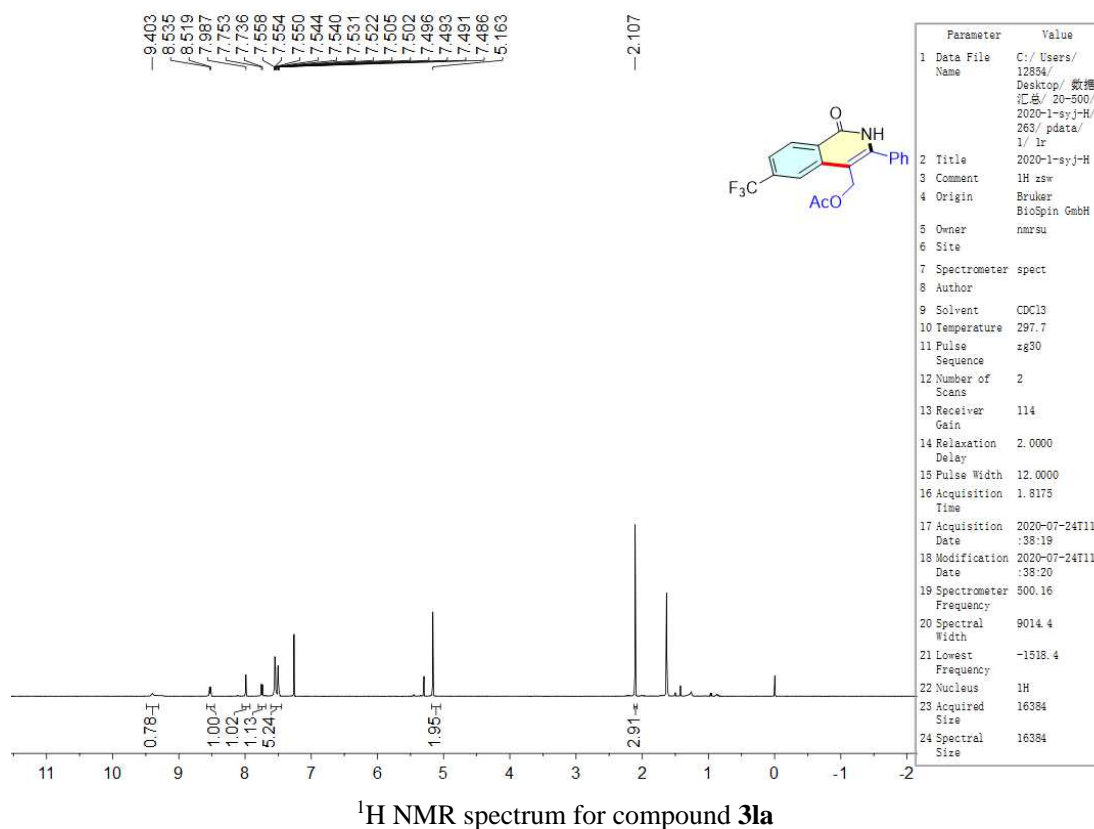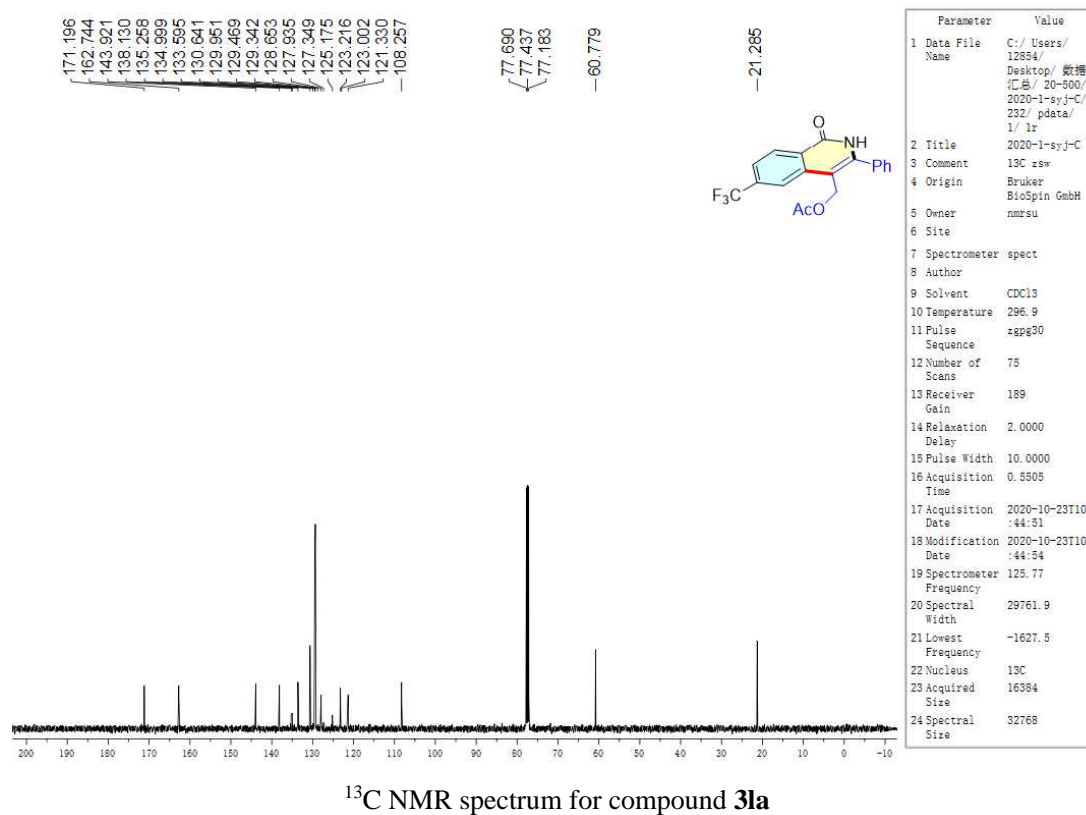

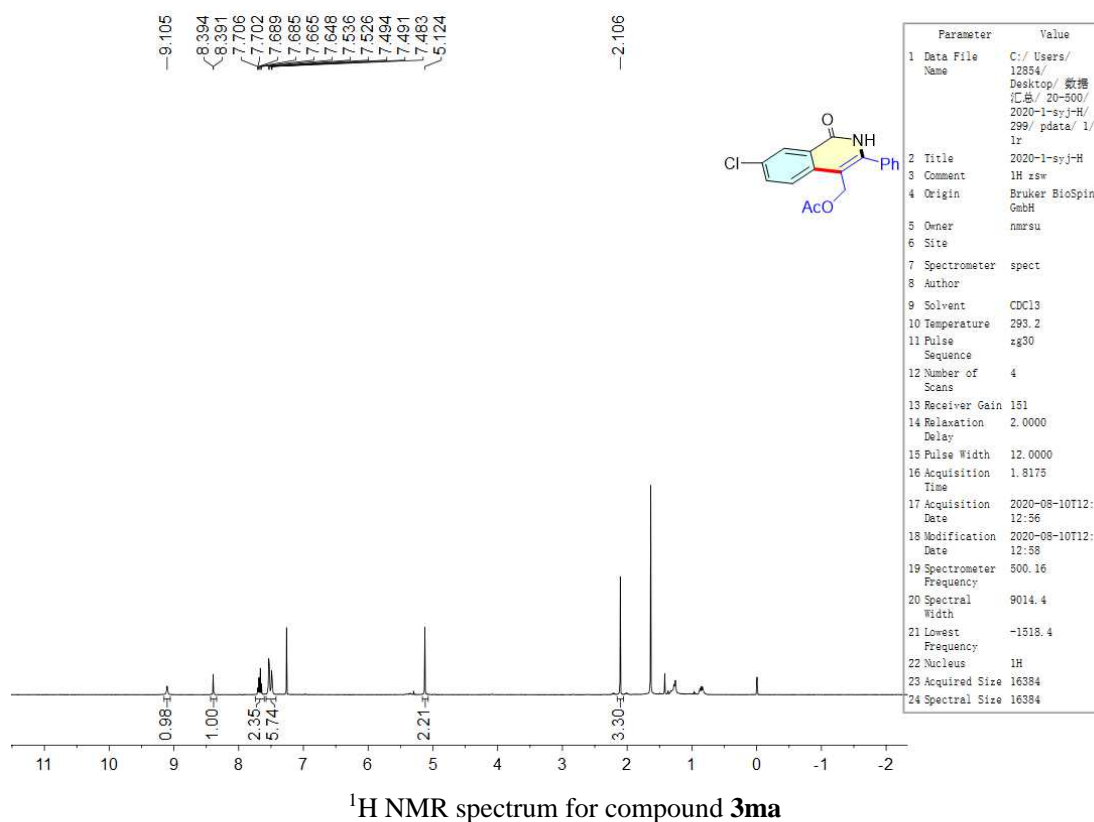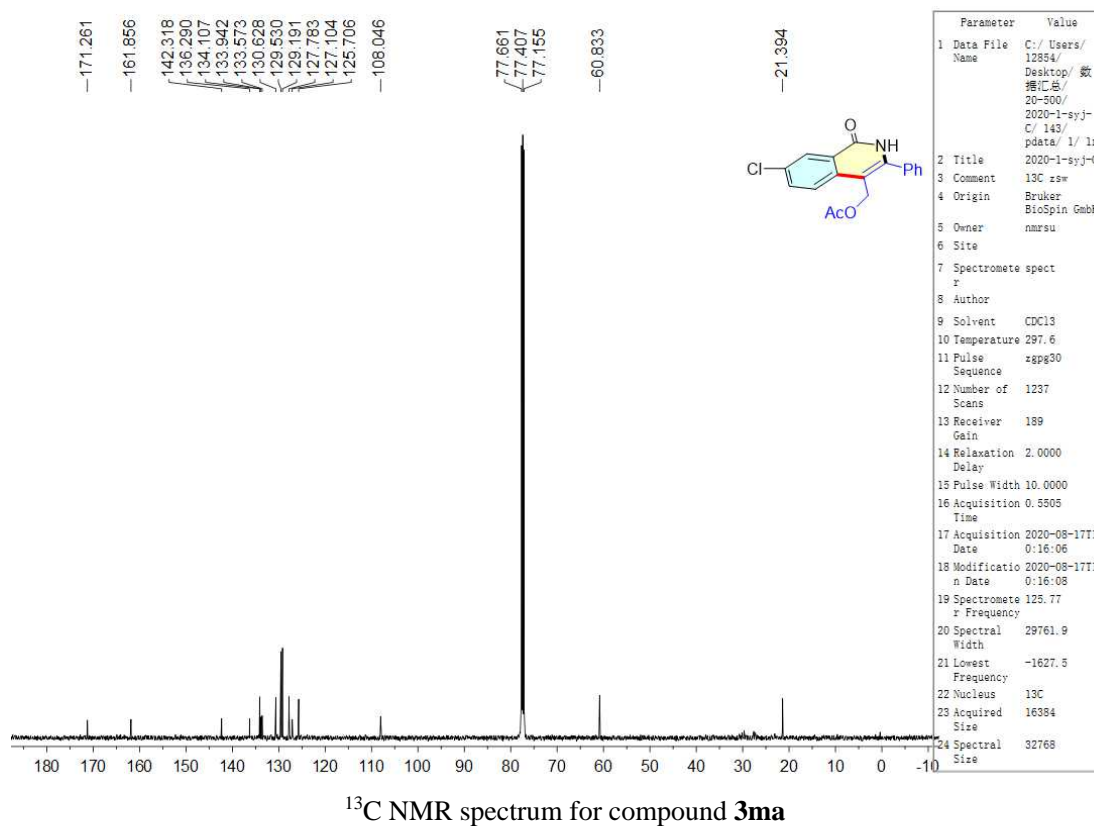

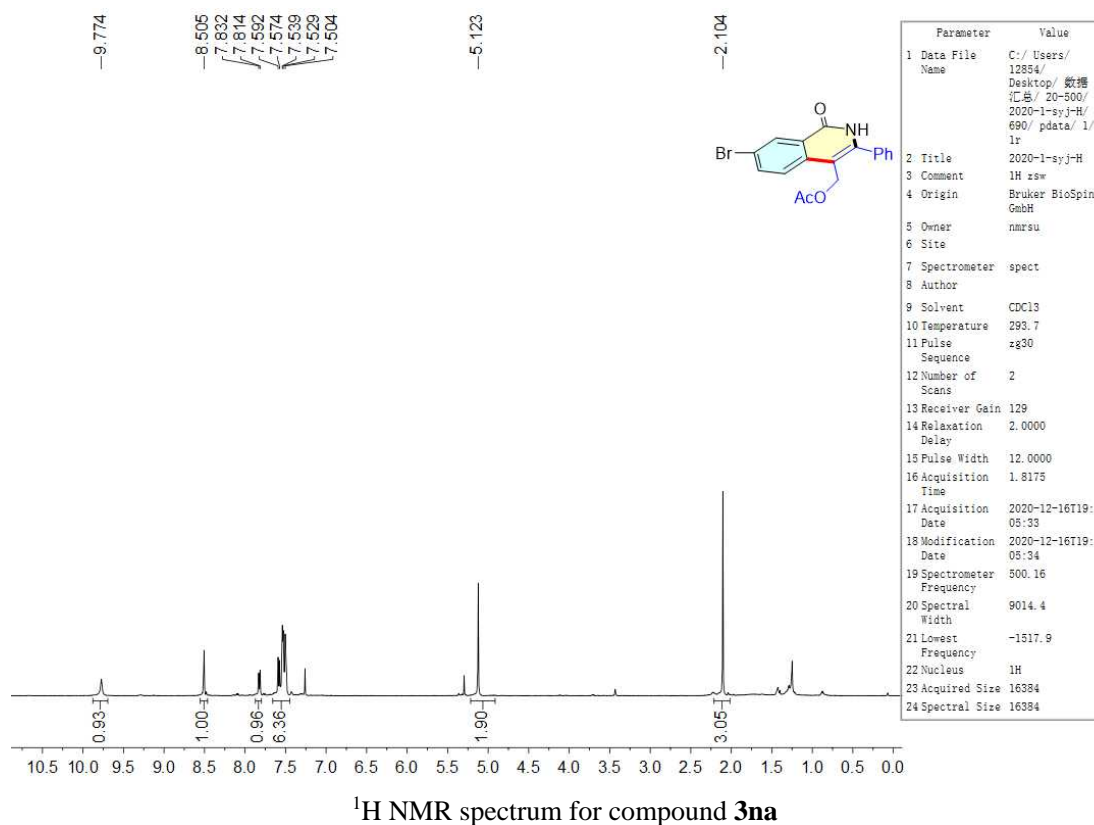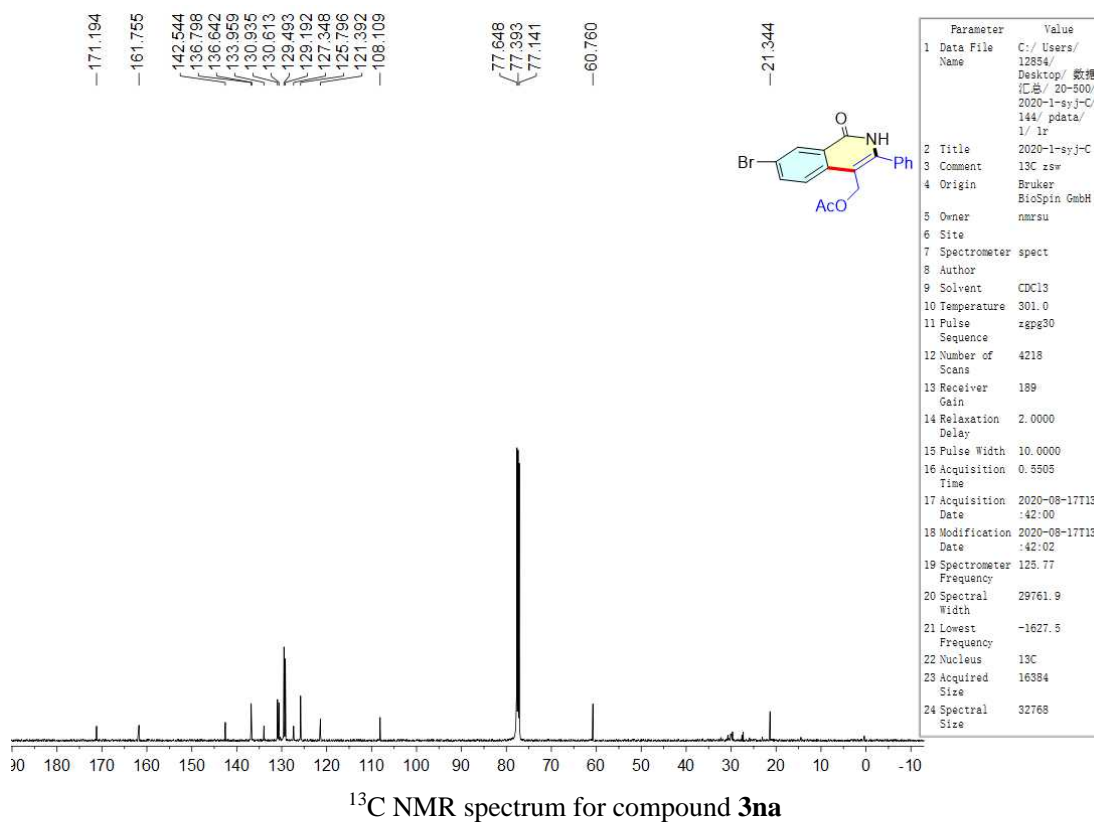



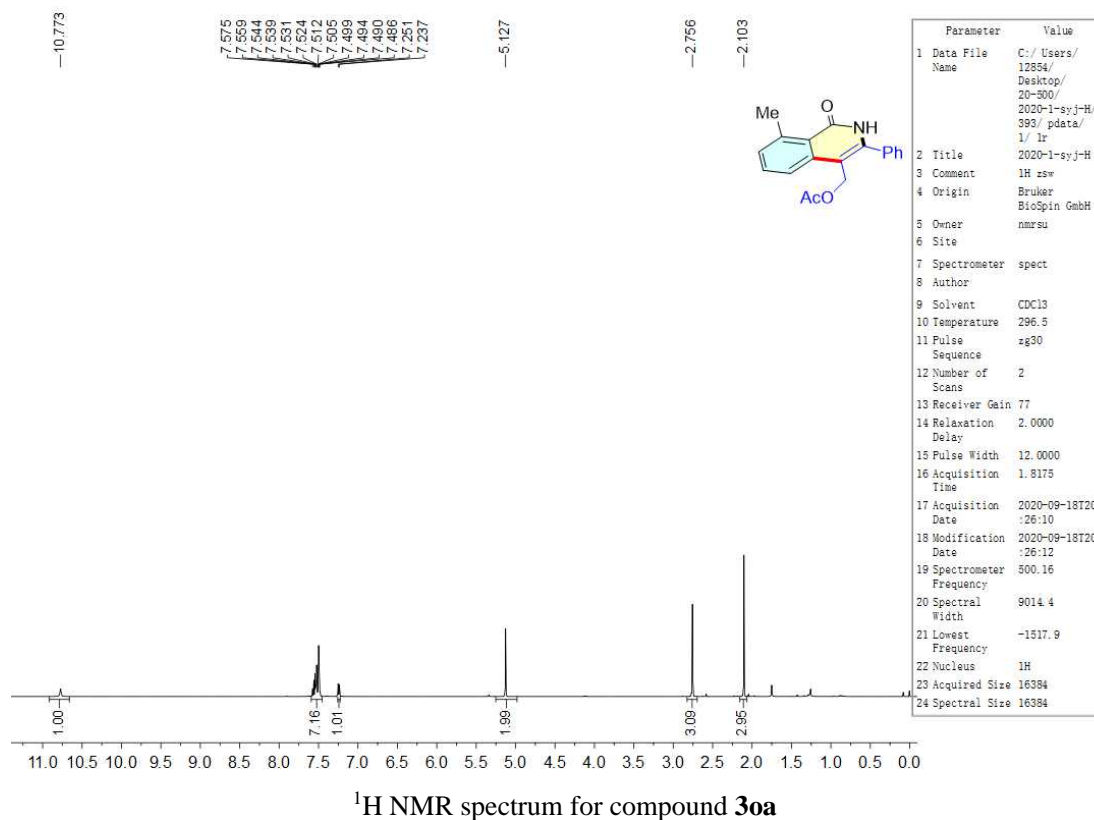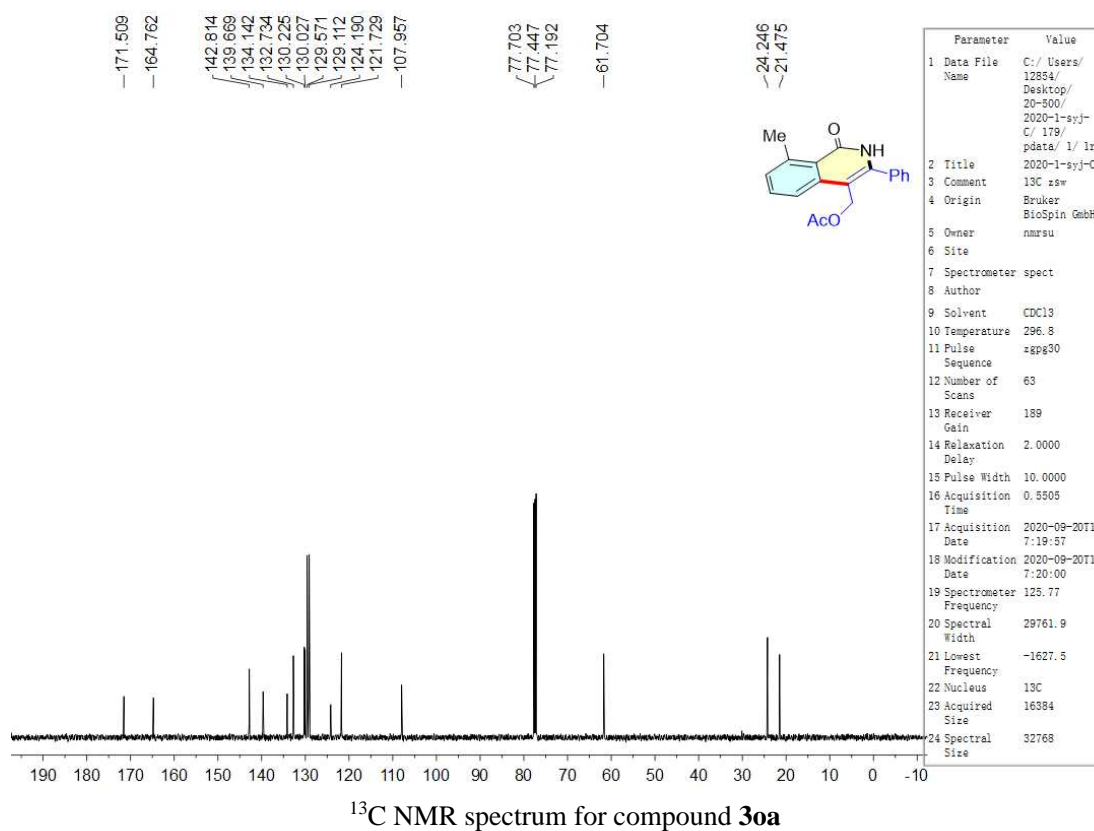



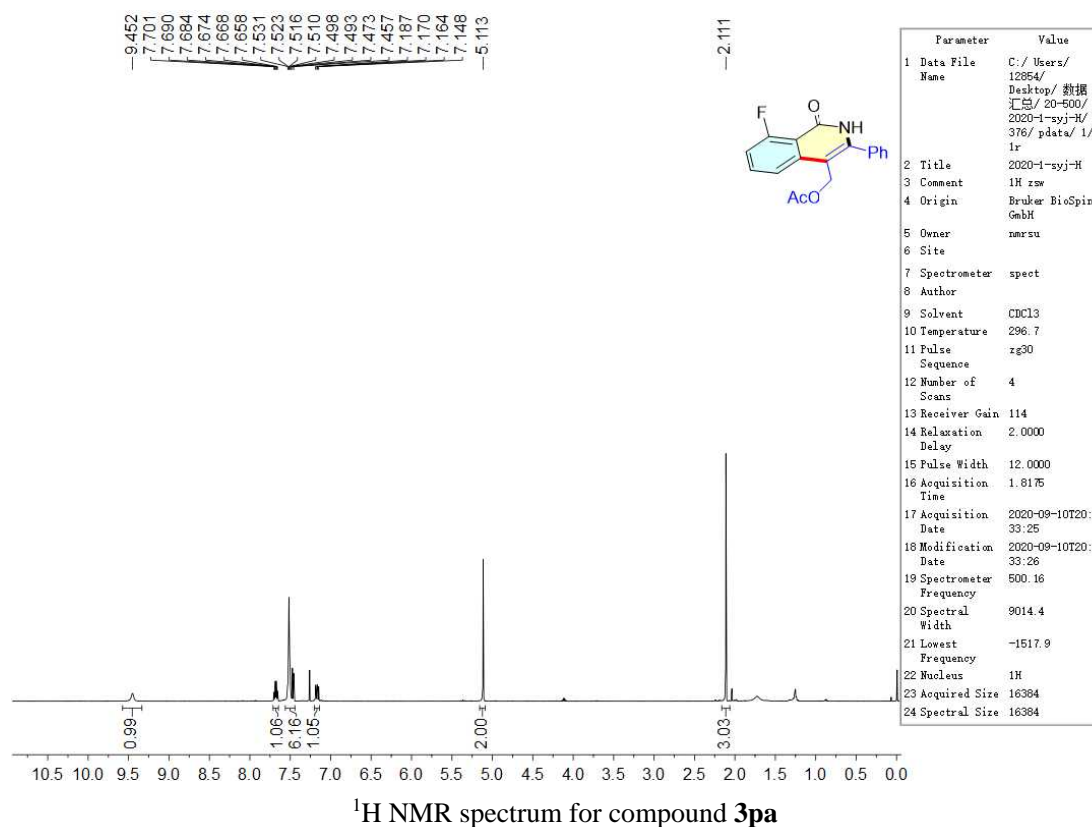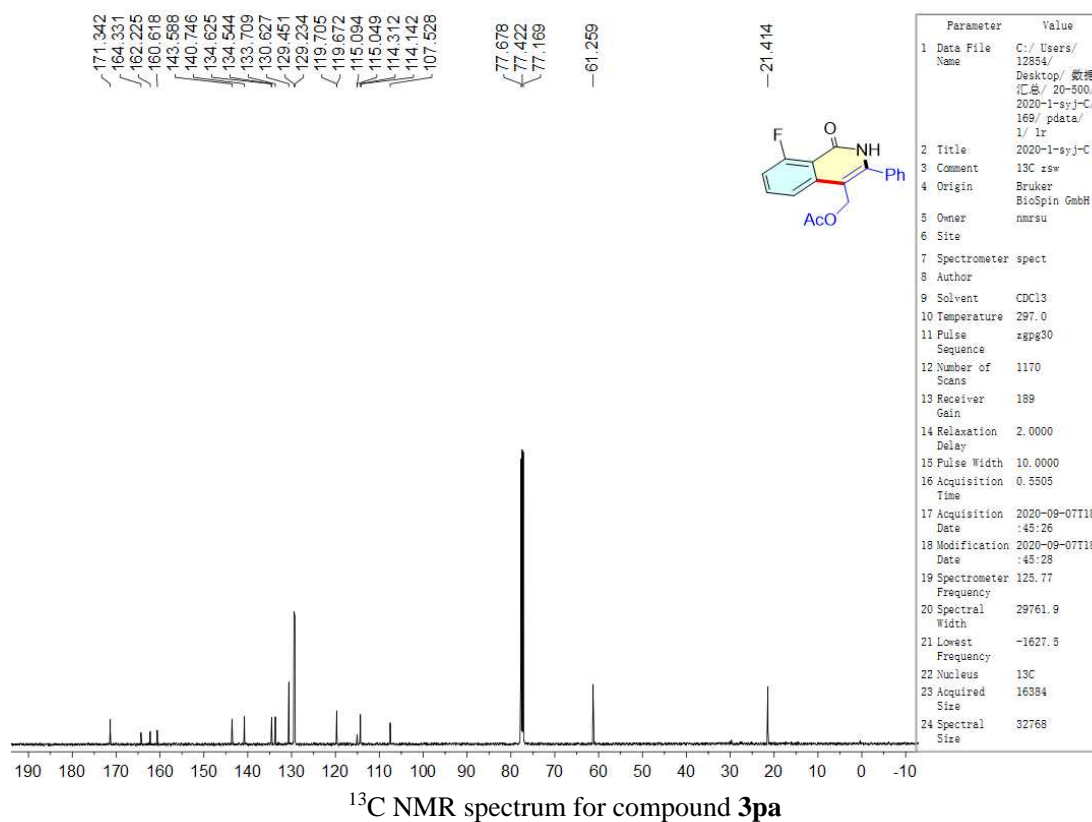

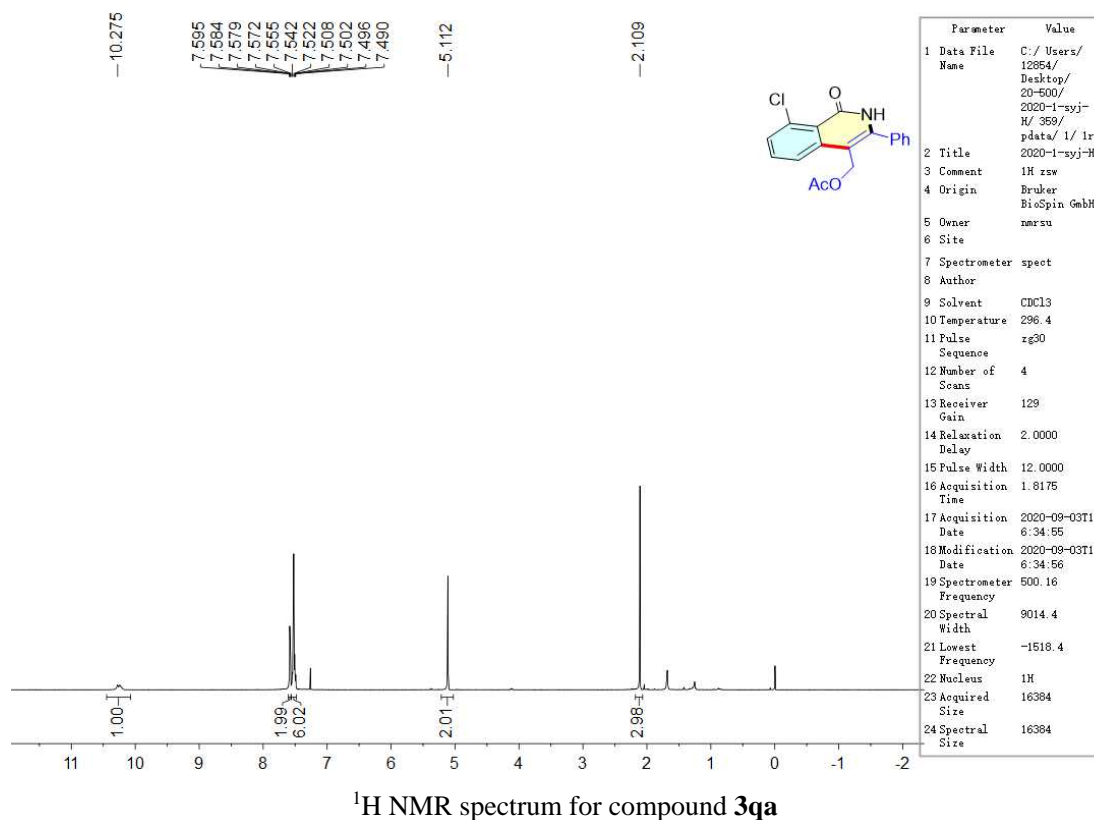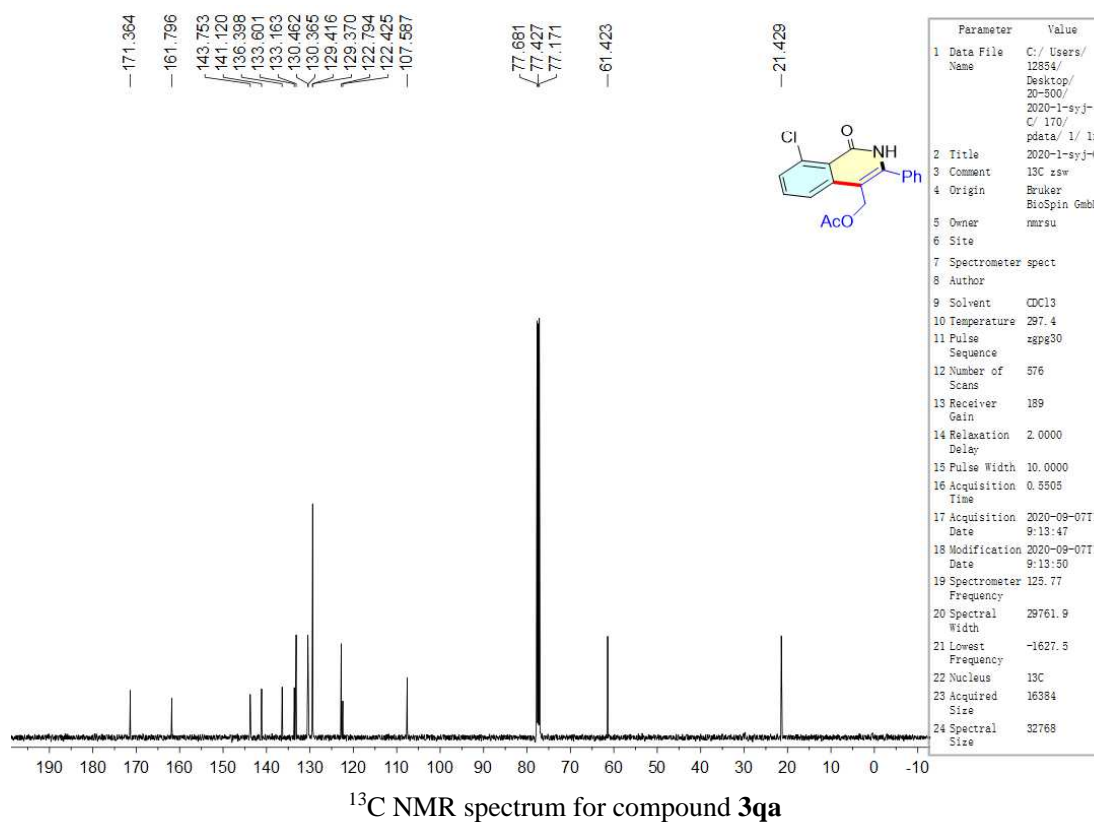

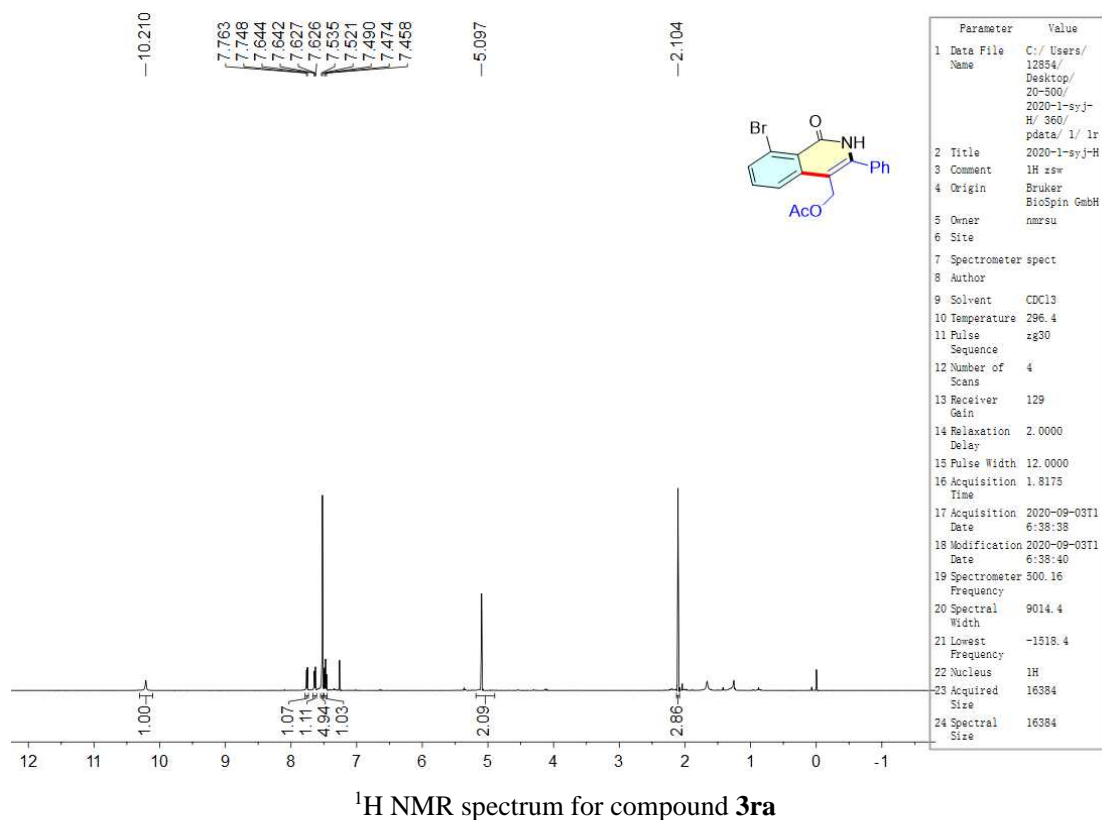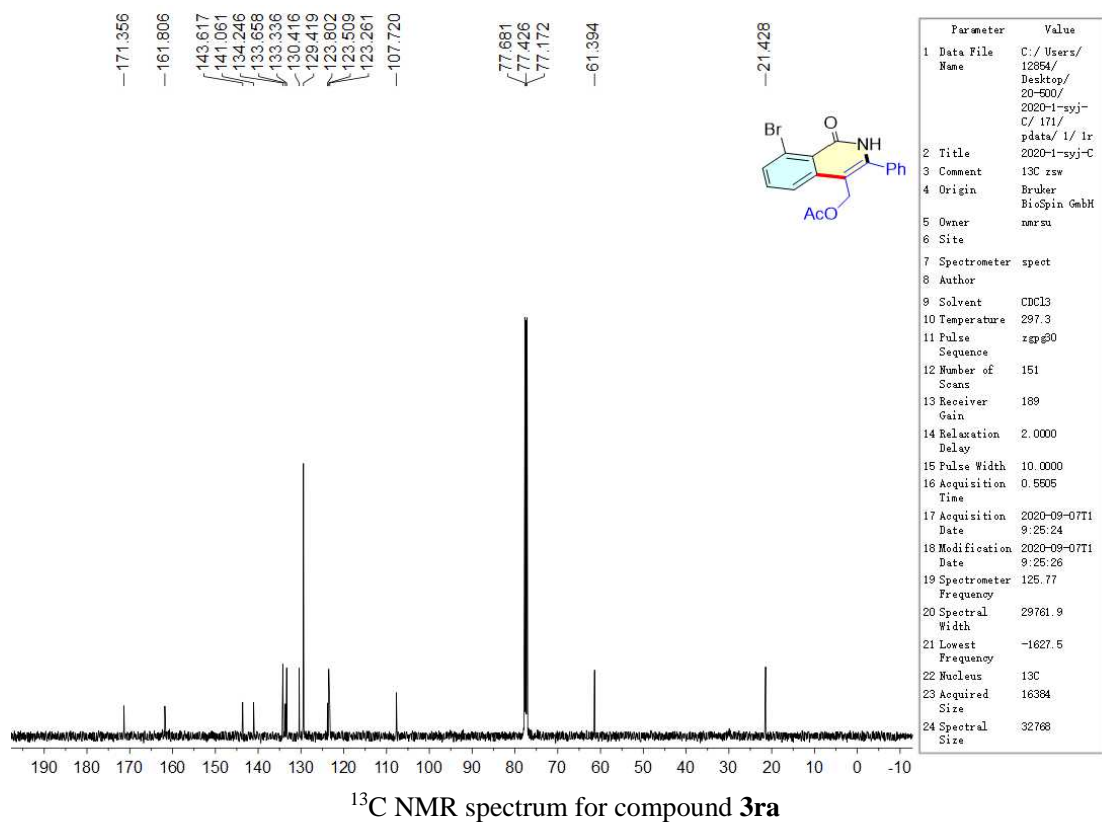

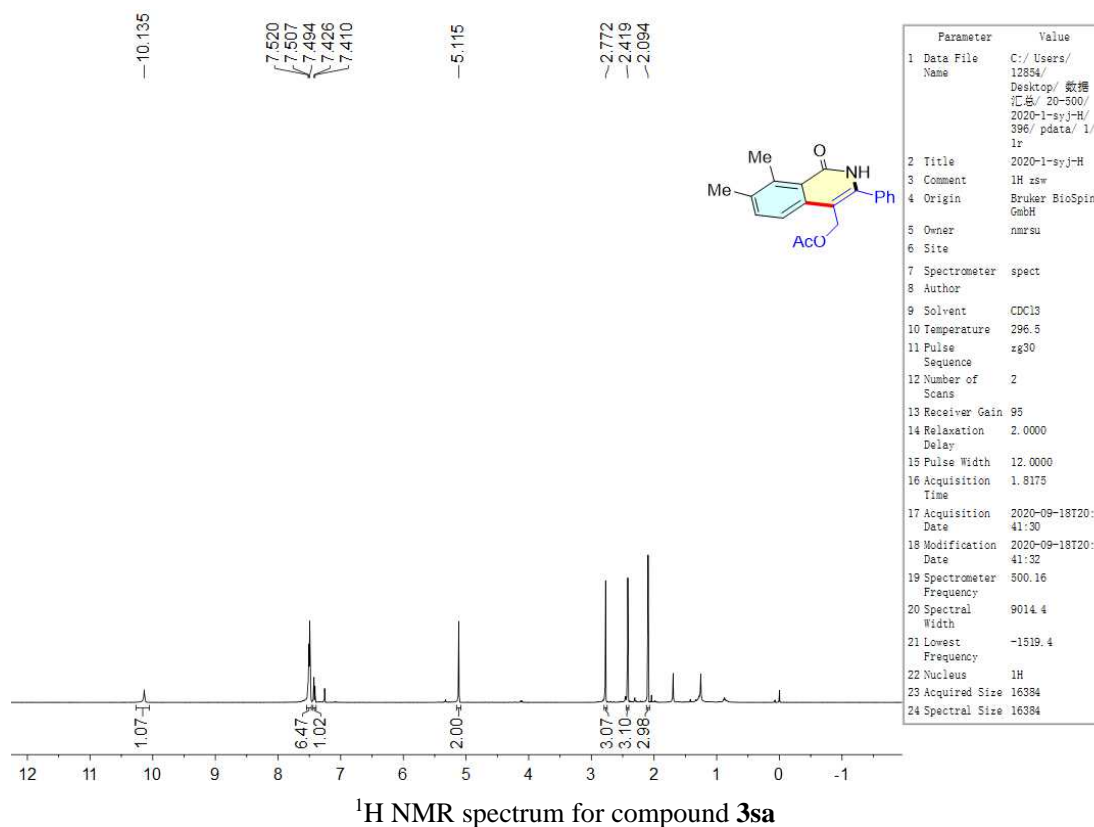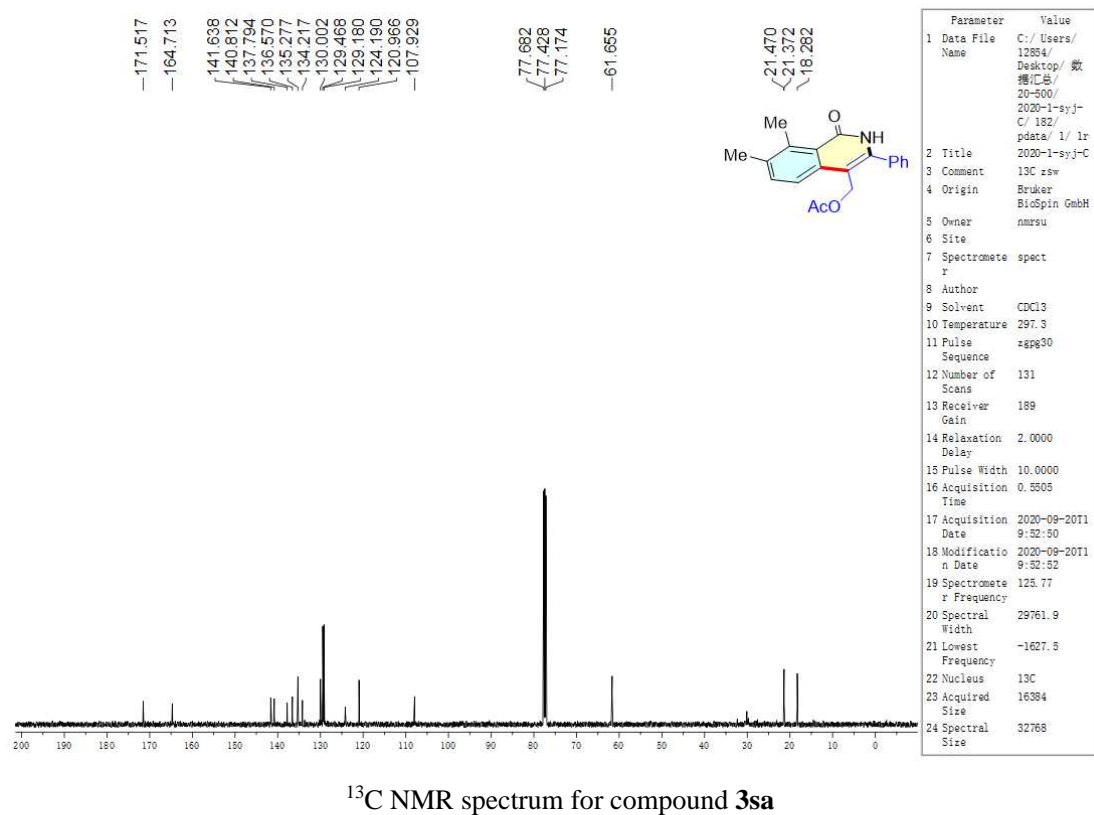

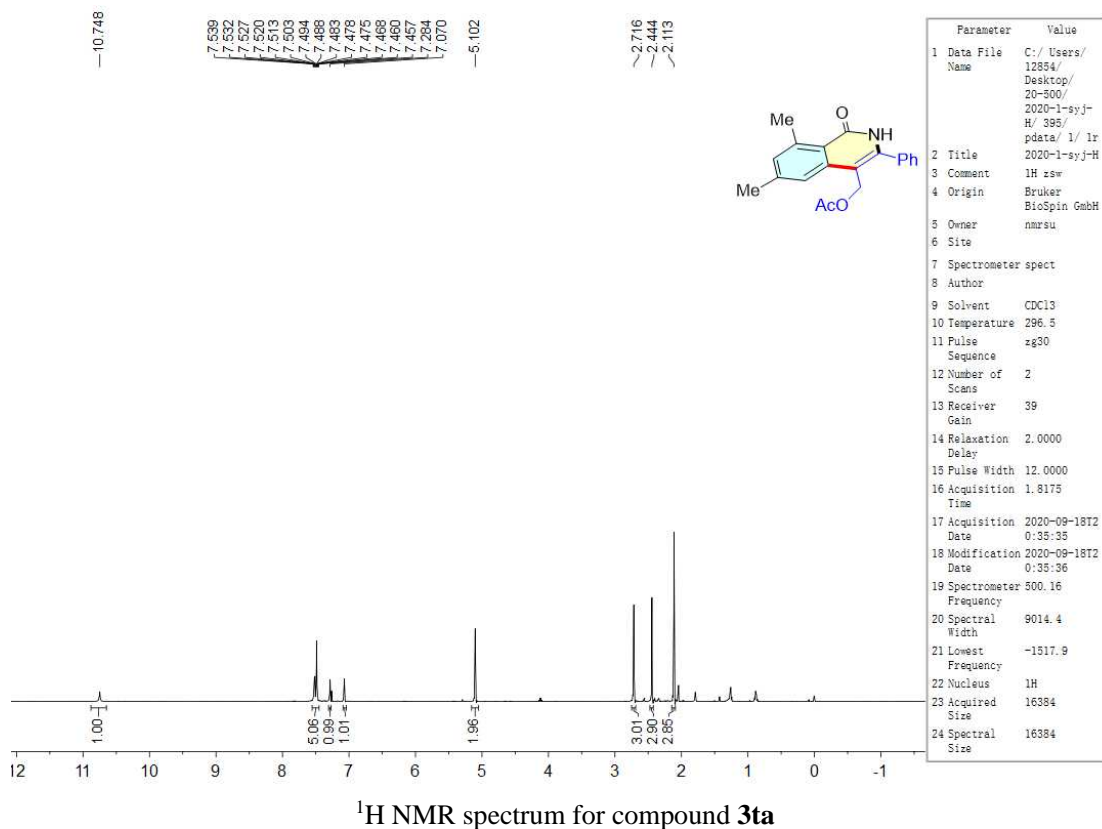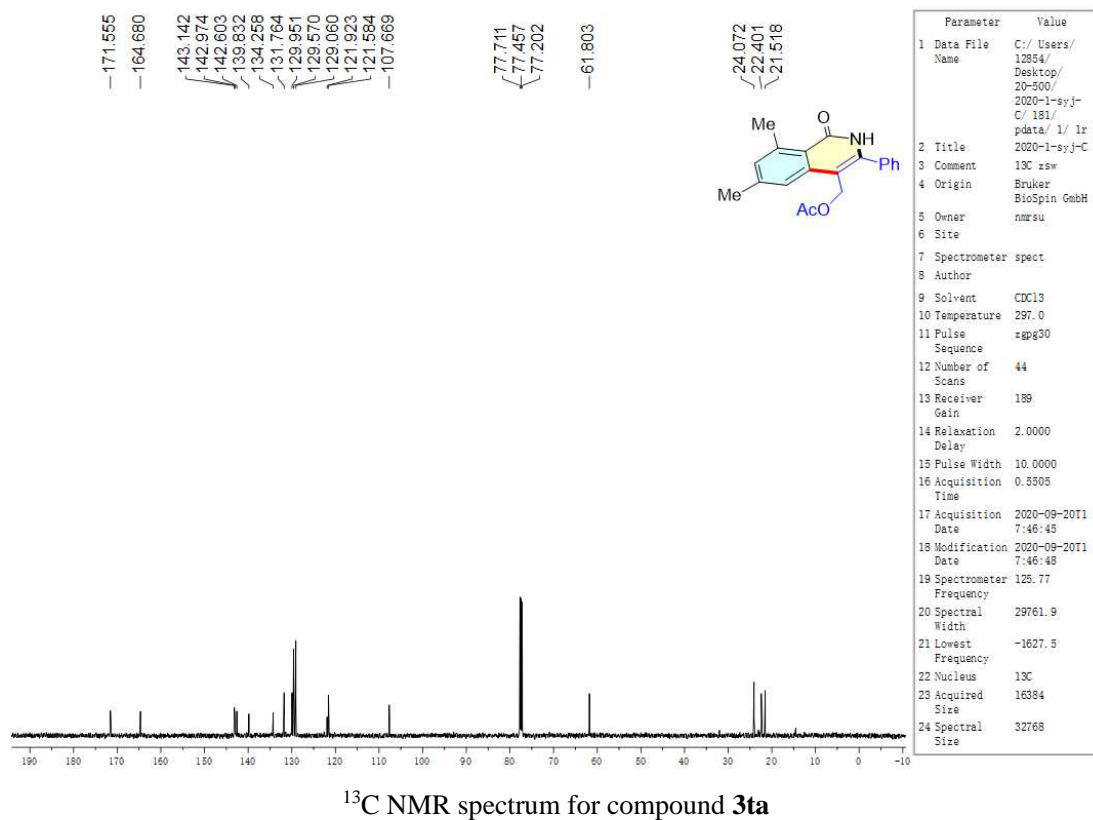

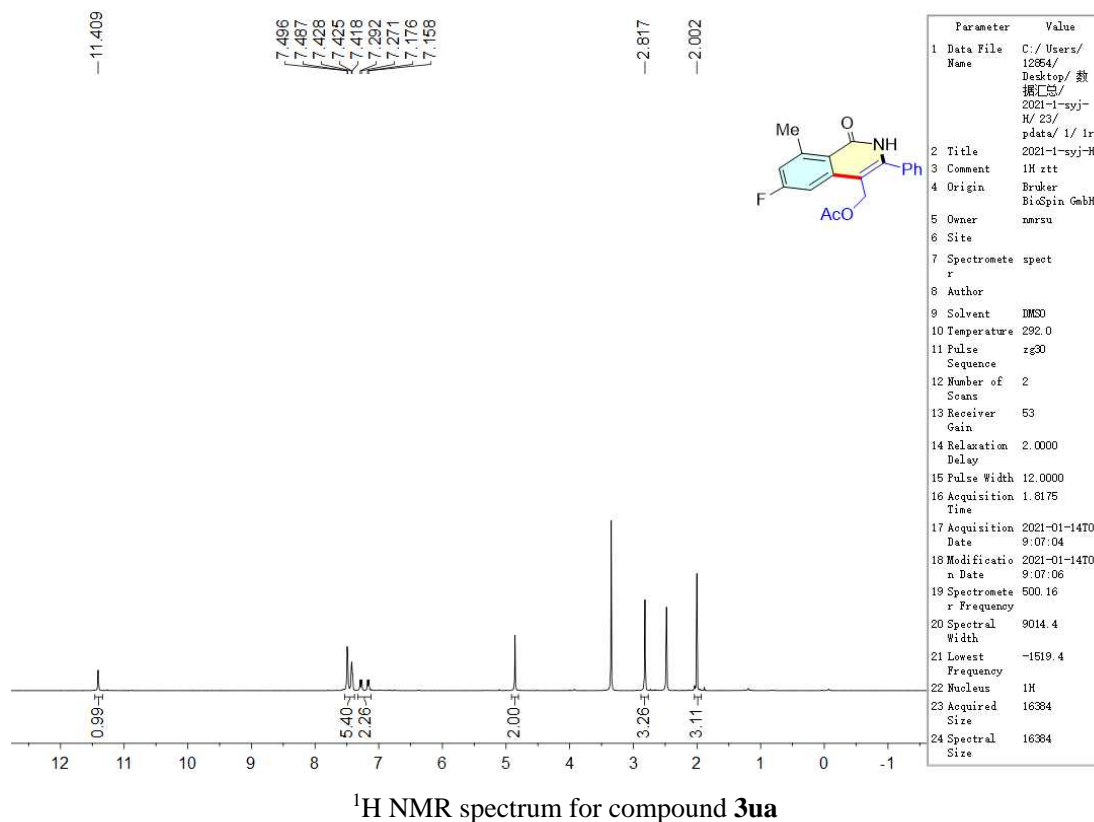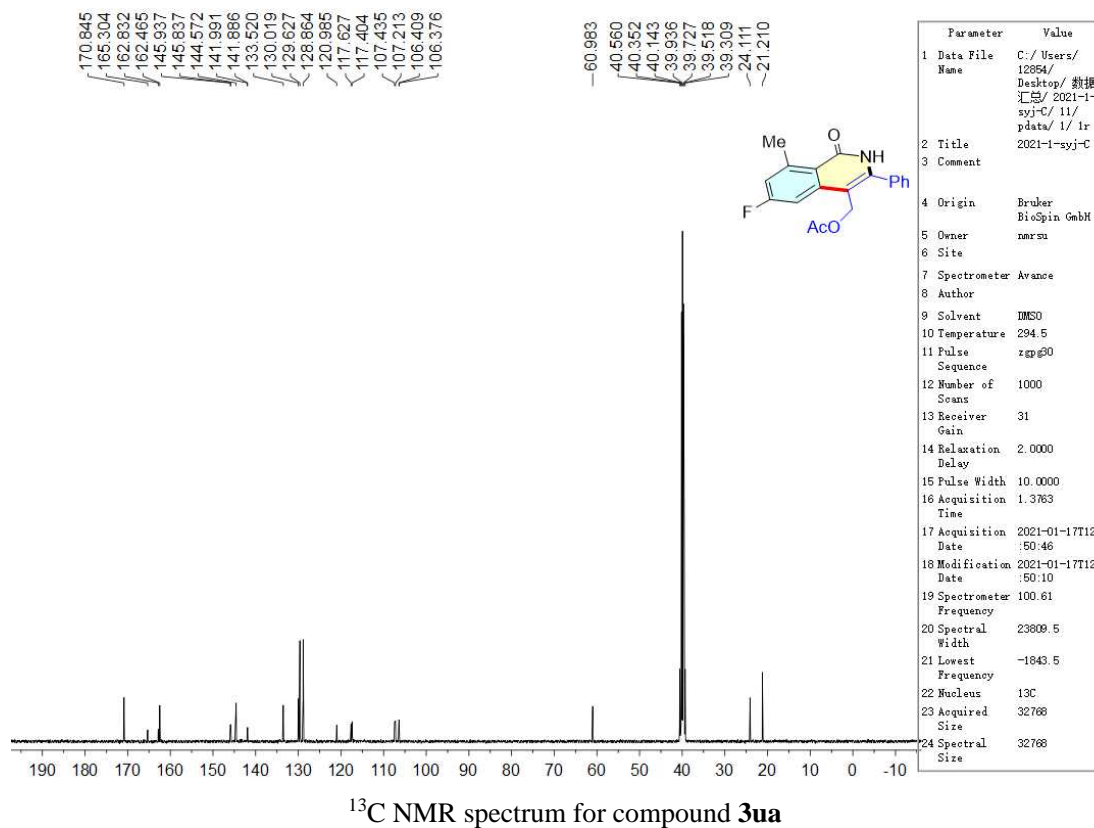

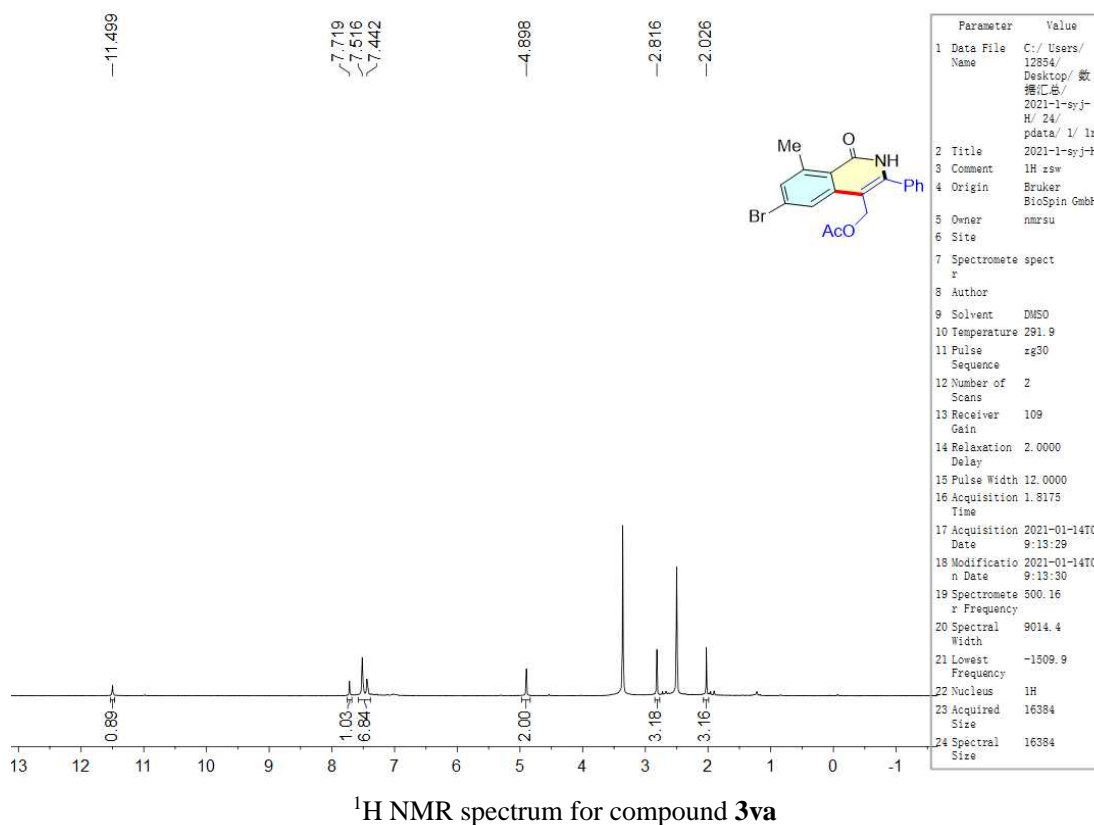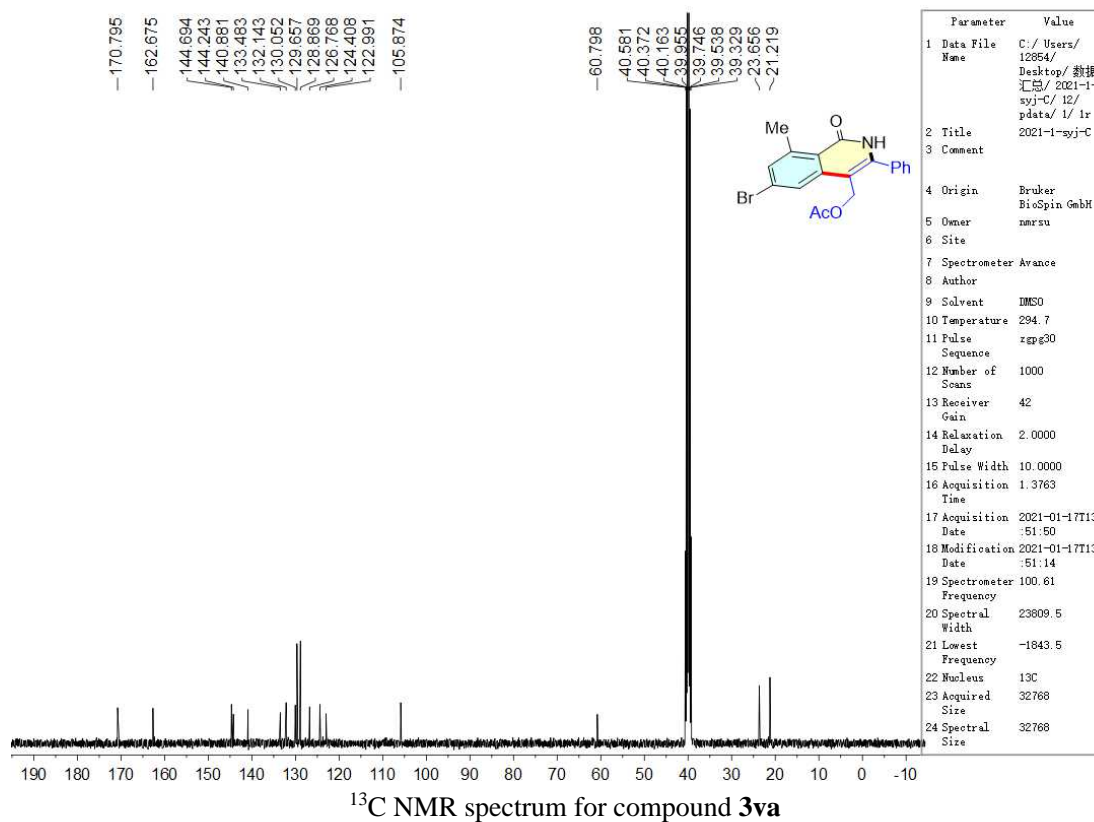



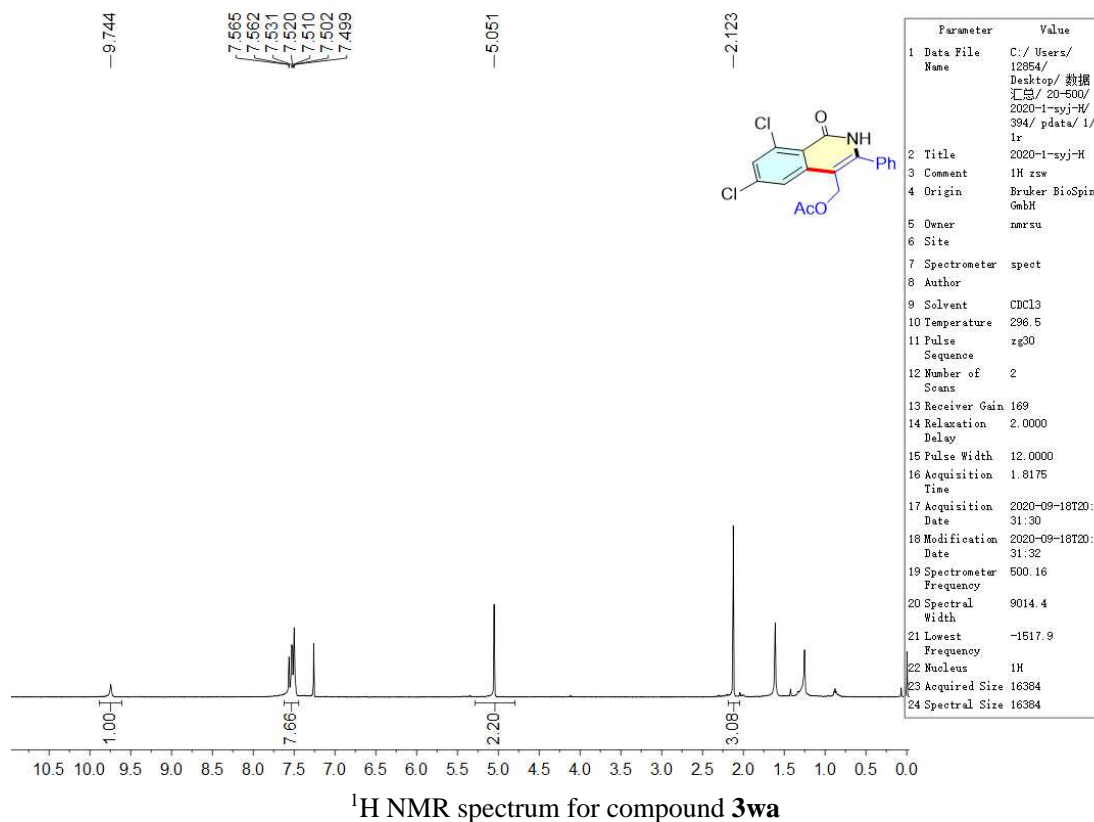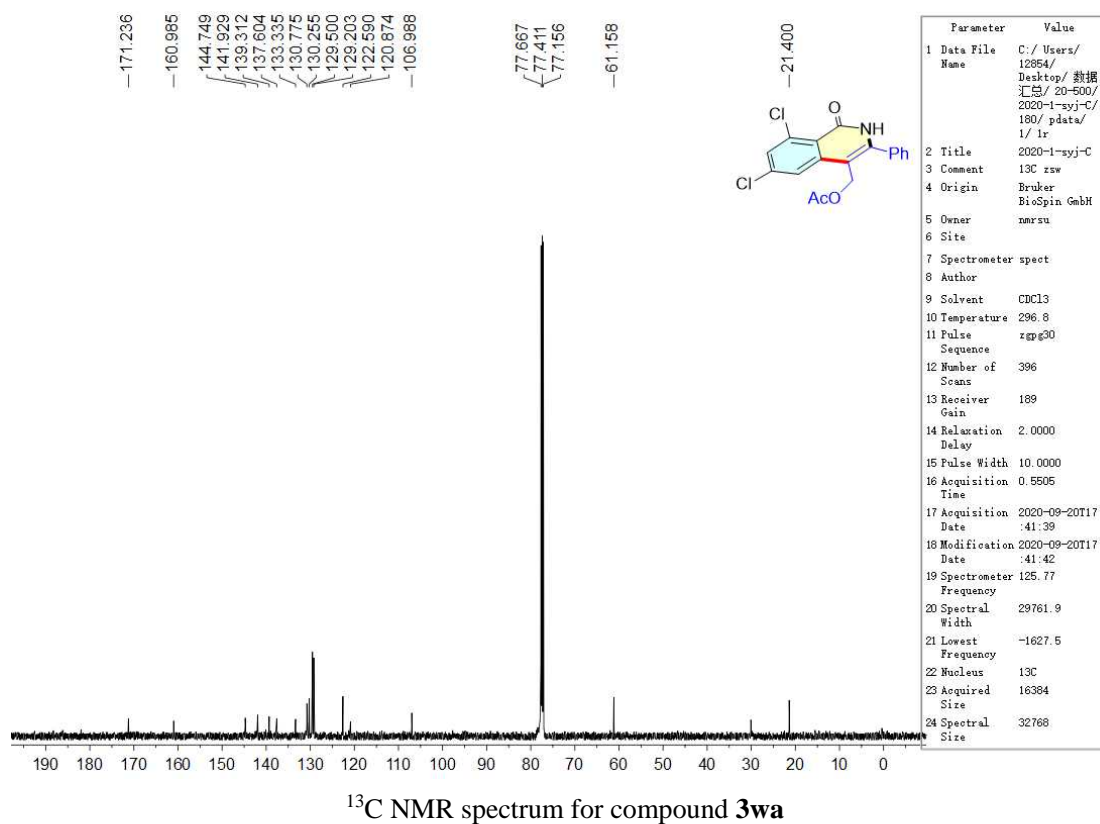



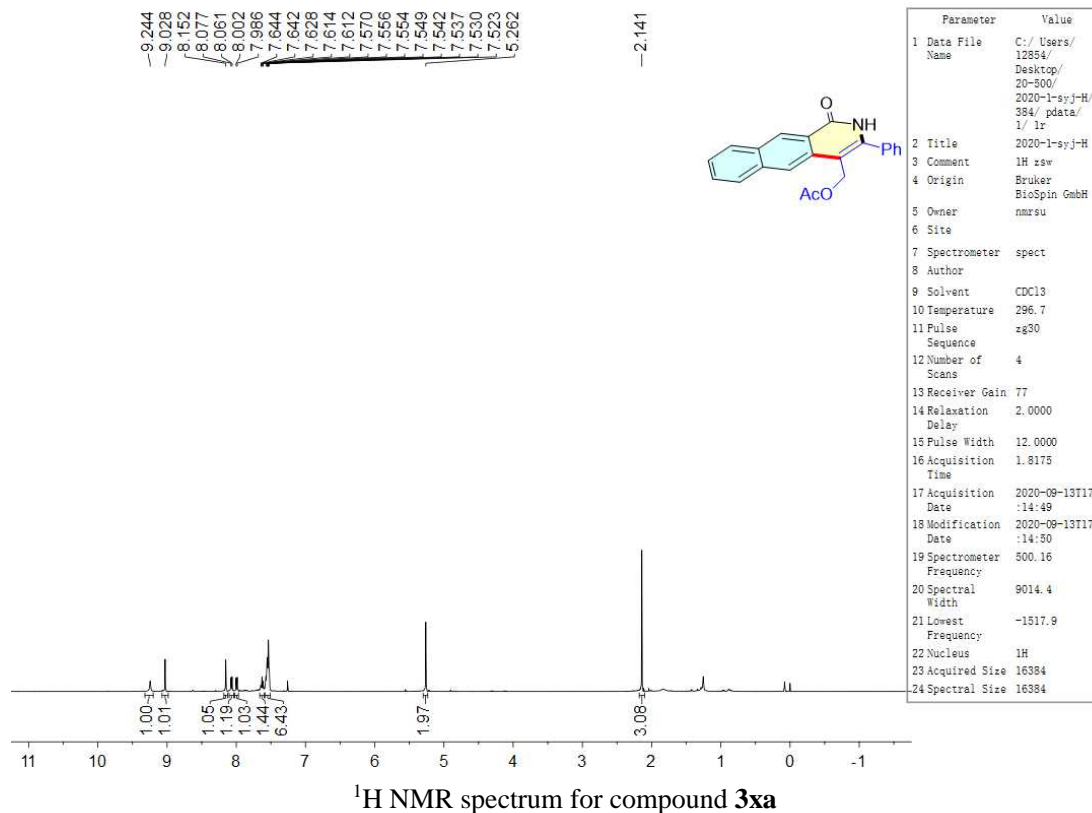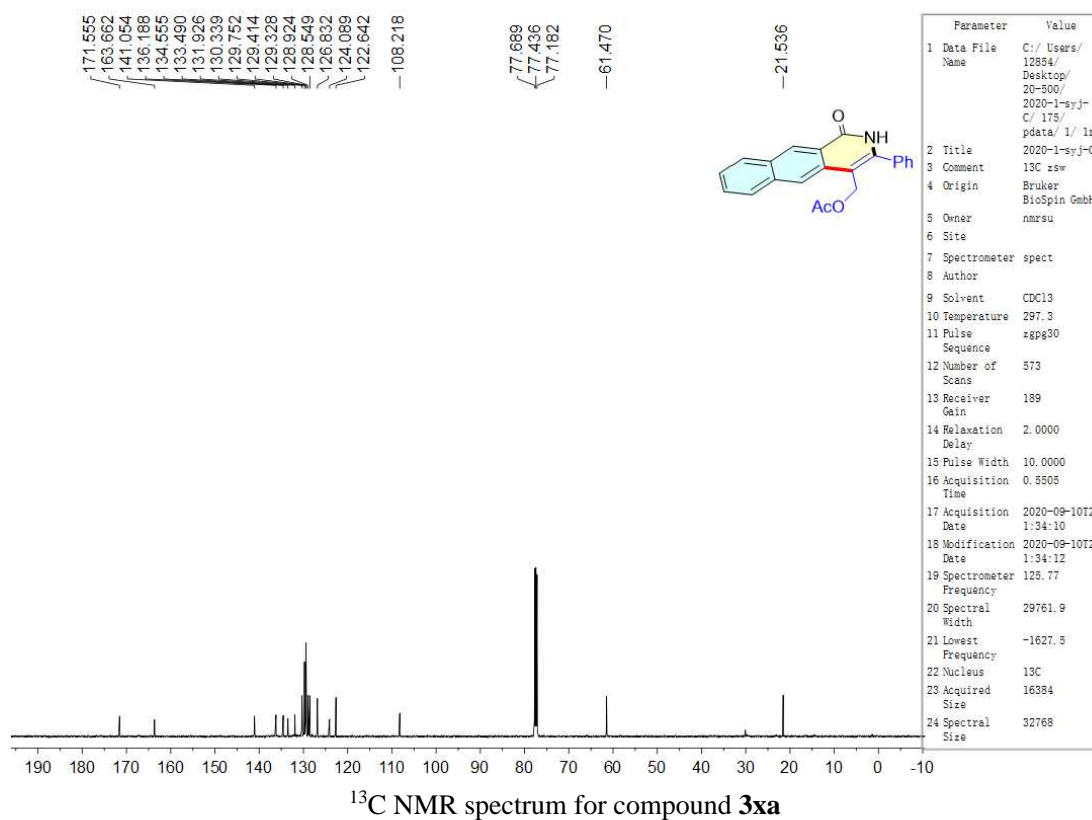

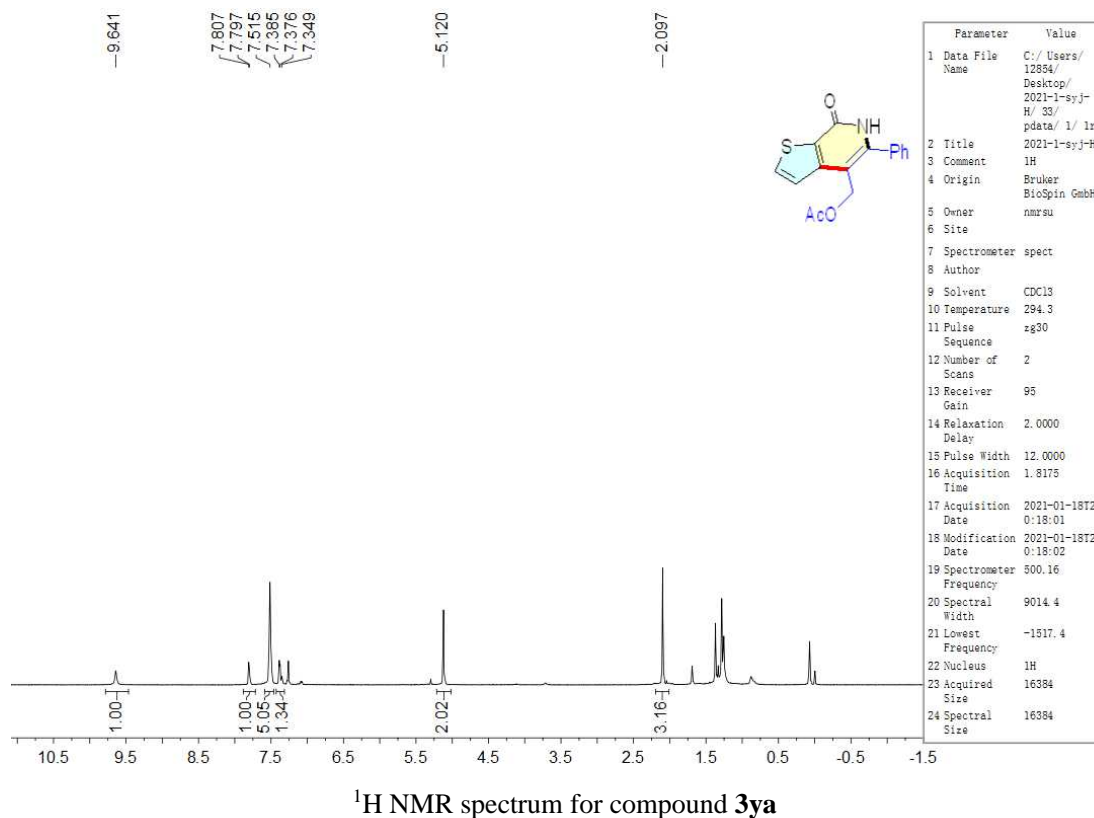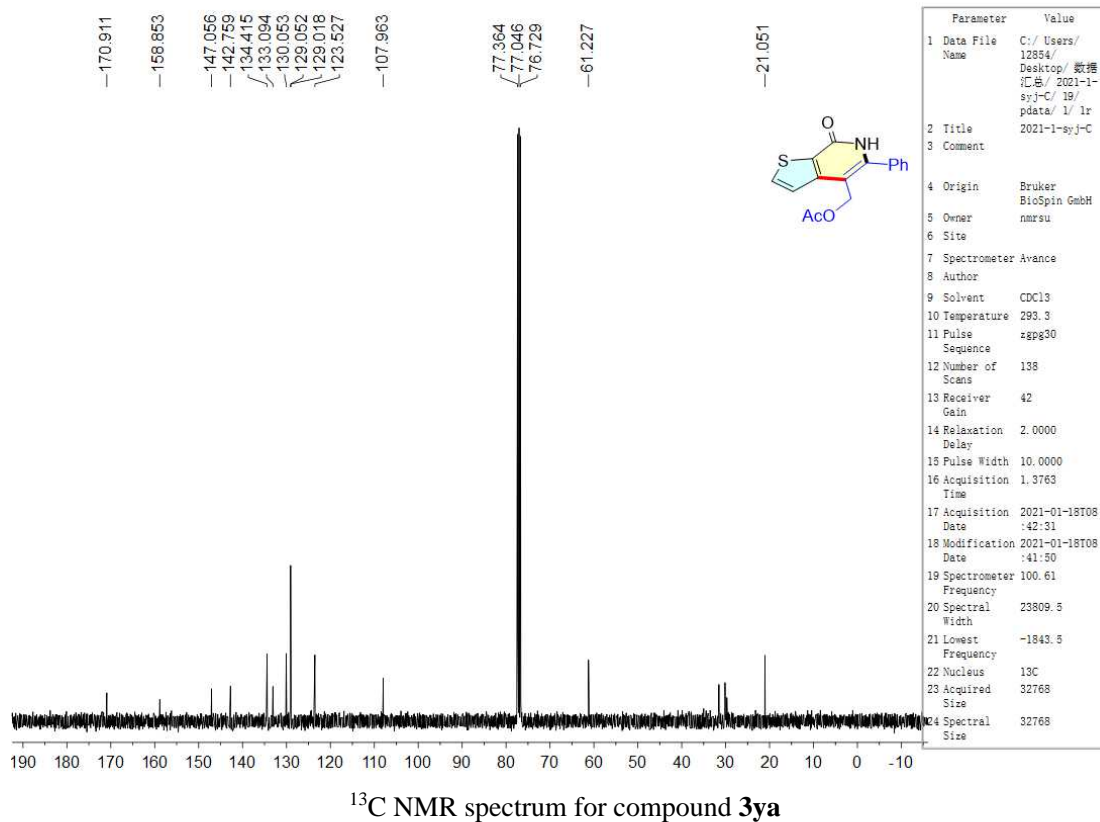

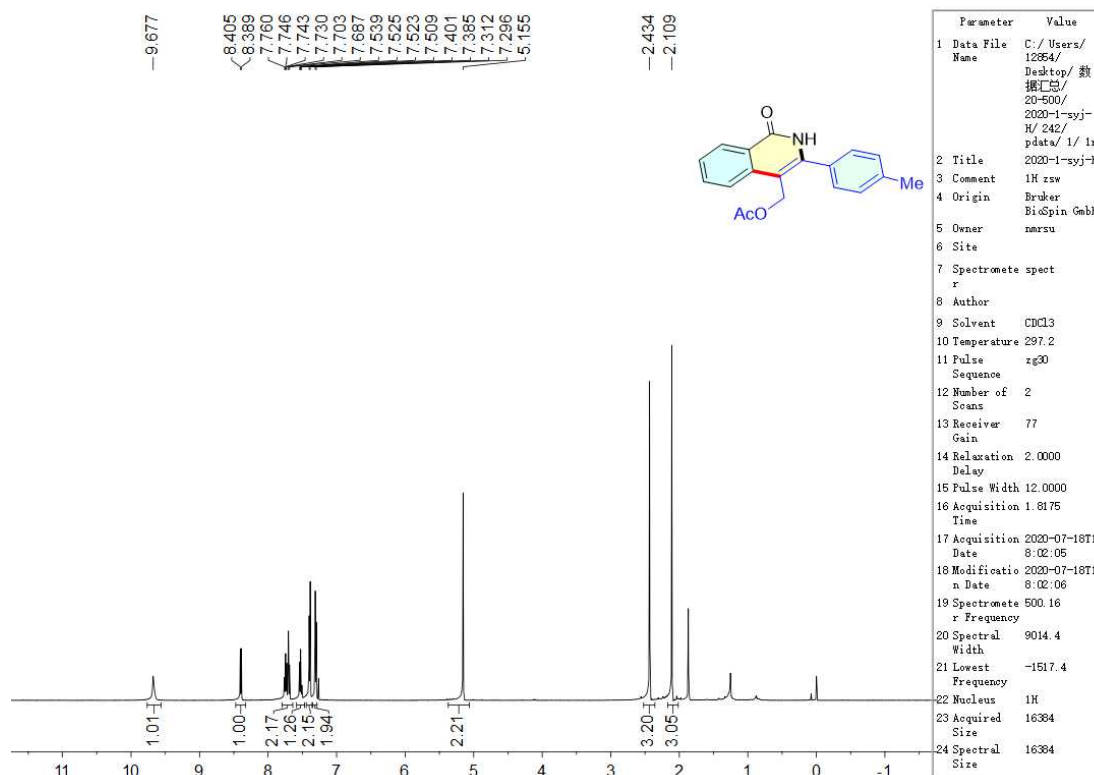

<sup>1</sup>H NMR spectrum for compound **3ab**

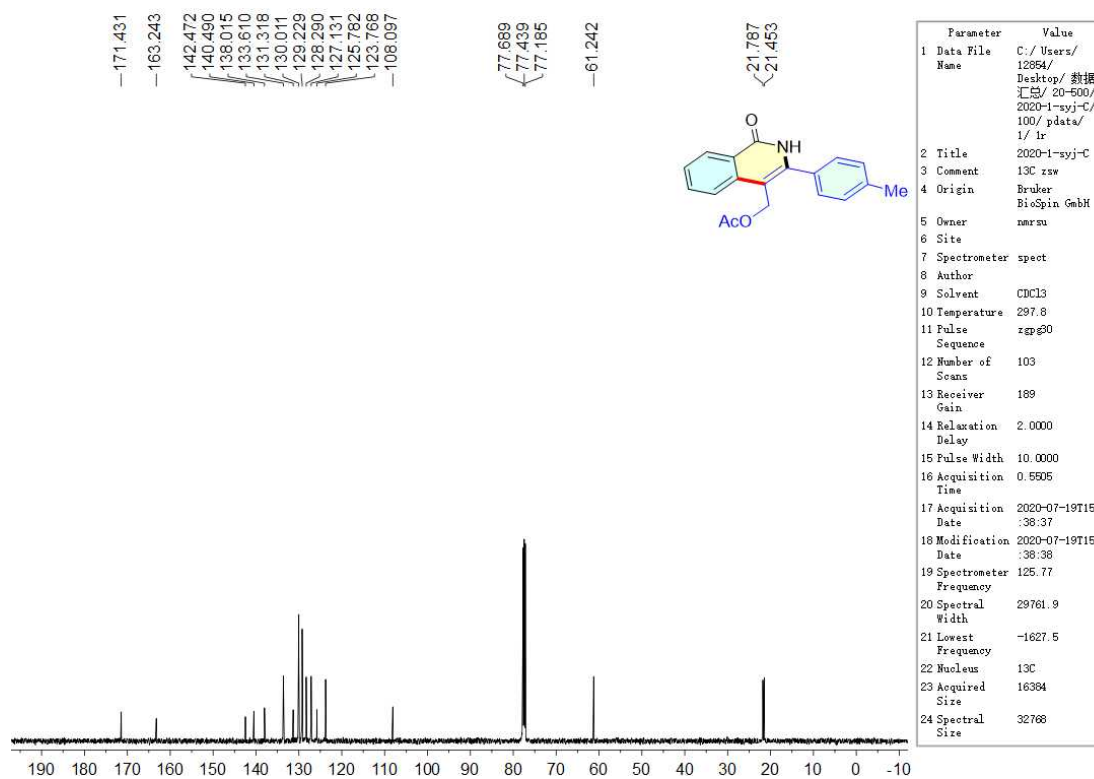

<sup>13</sup>C NMR spectrum for compound **3ab**

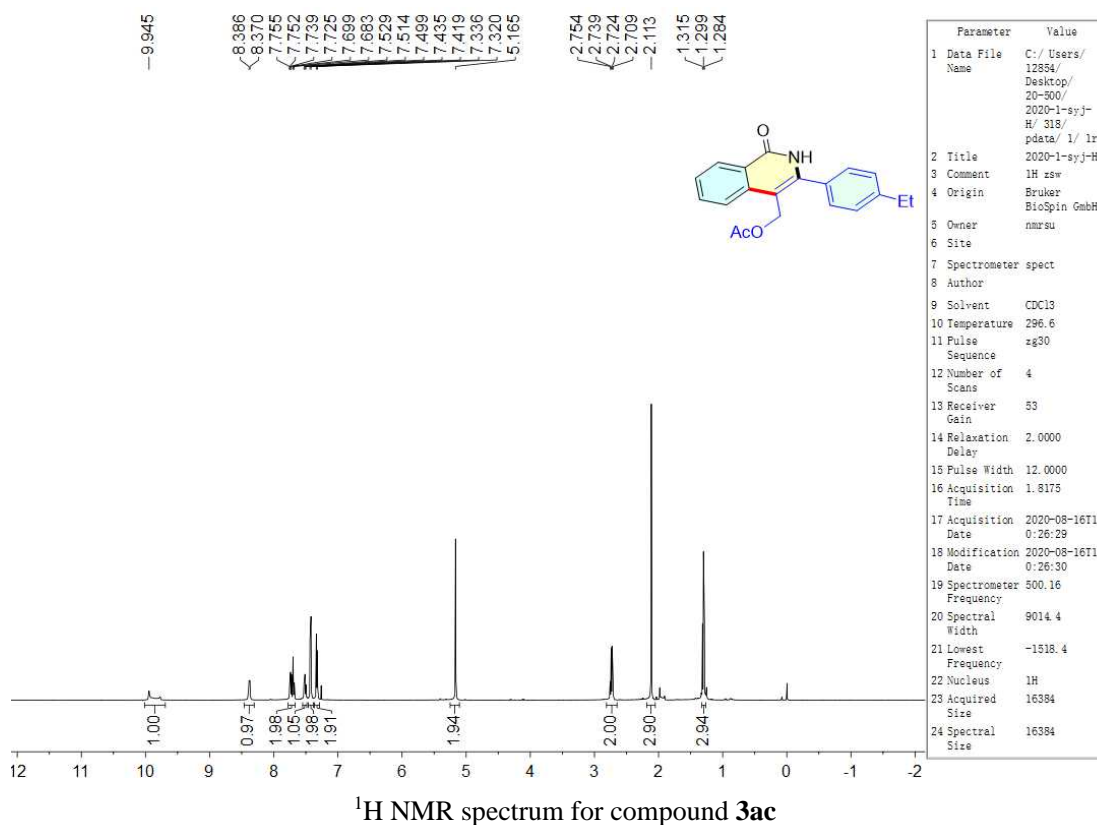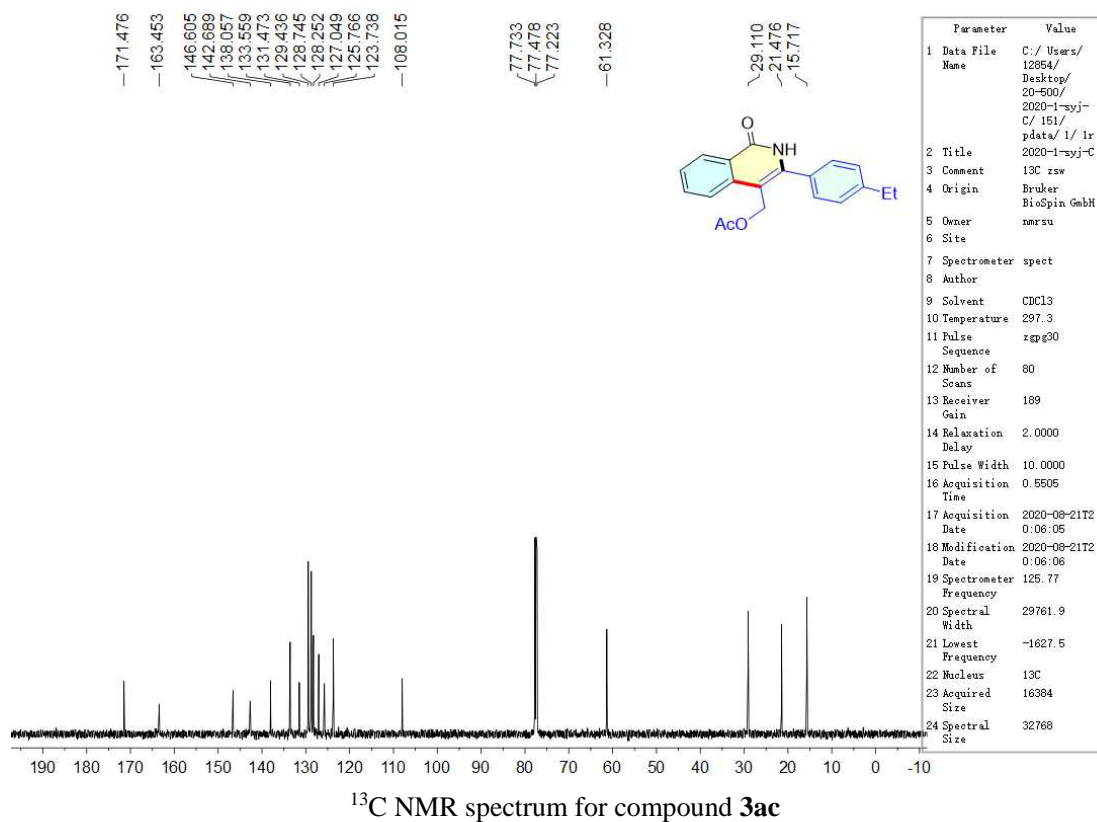

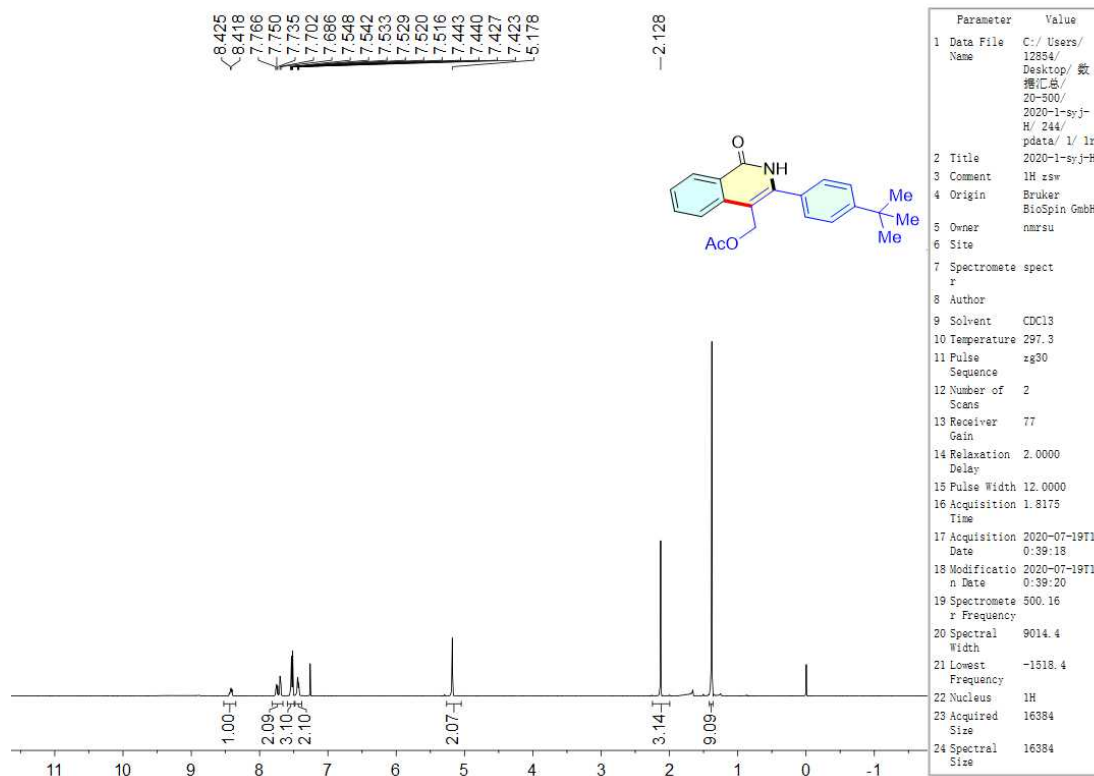

<sup>1</sup>H NMR spectrum for compound **3ad**

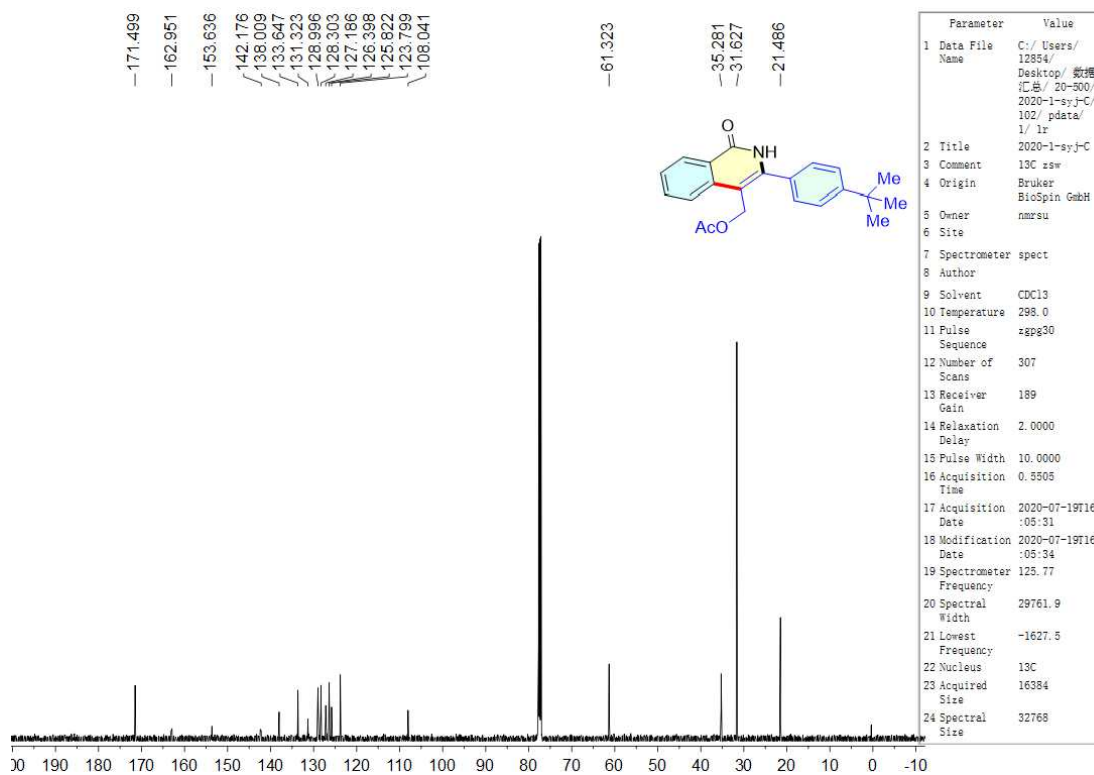

<sup>13</sup>C NMR spectrum for compound **3ad**

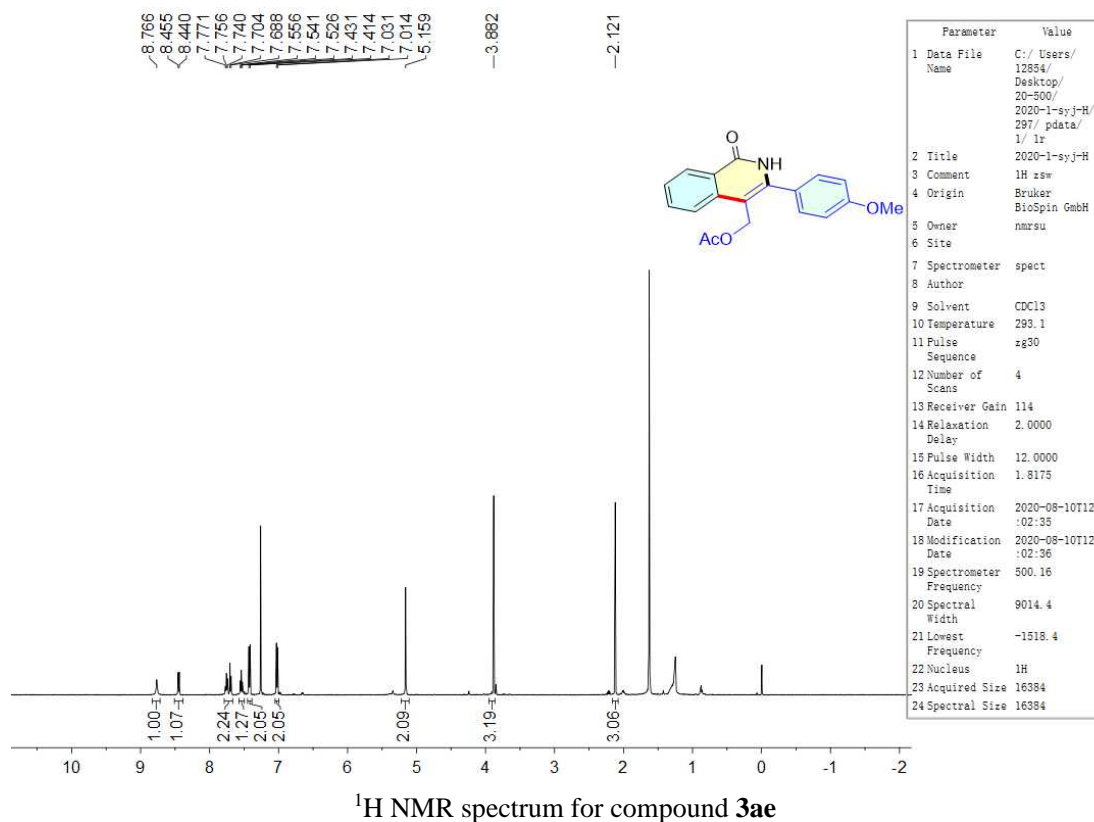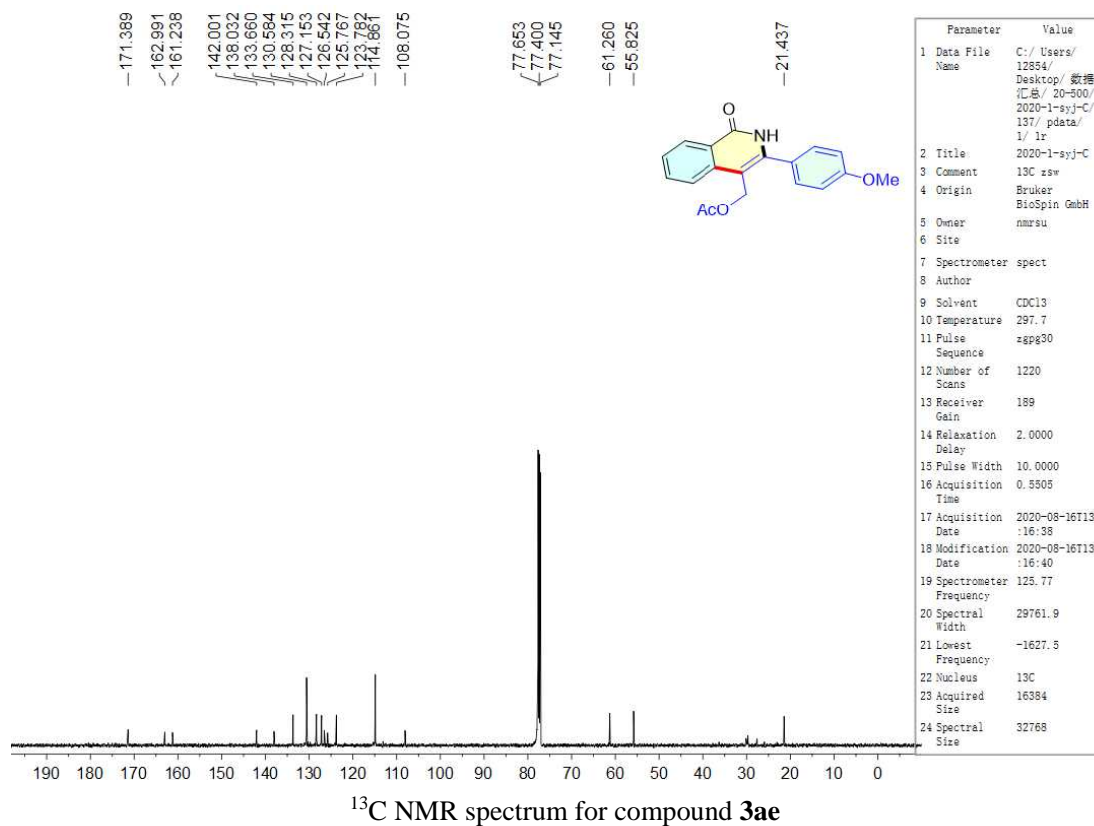

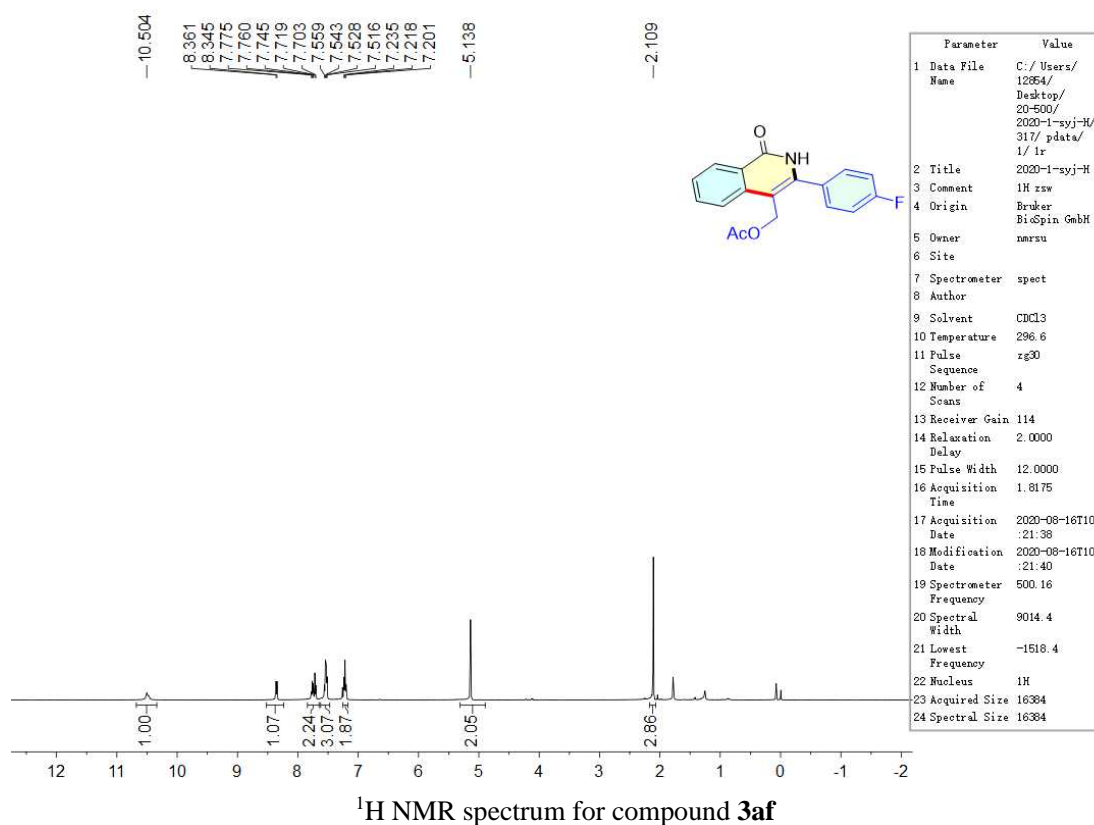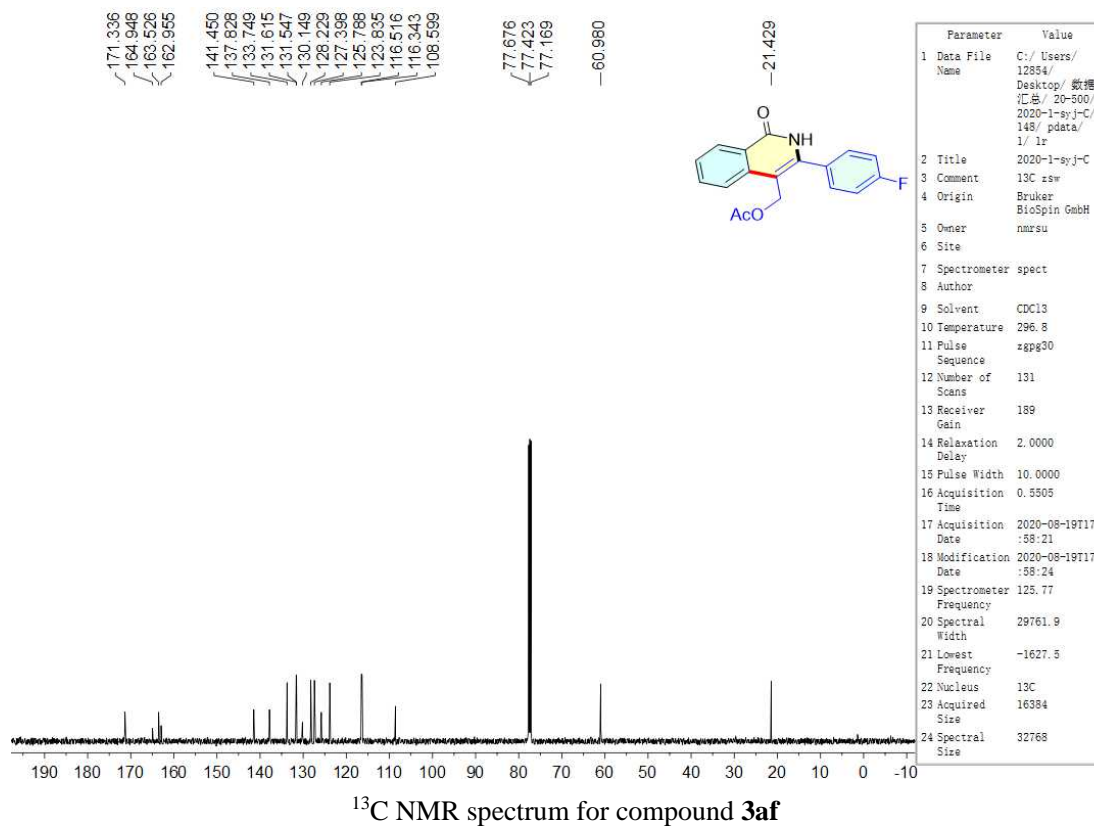



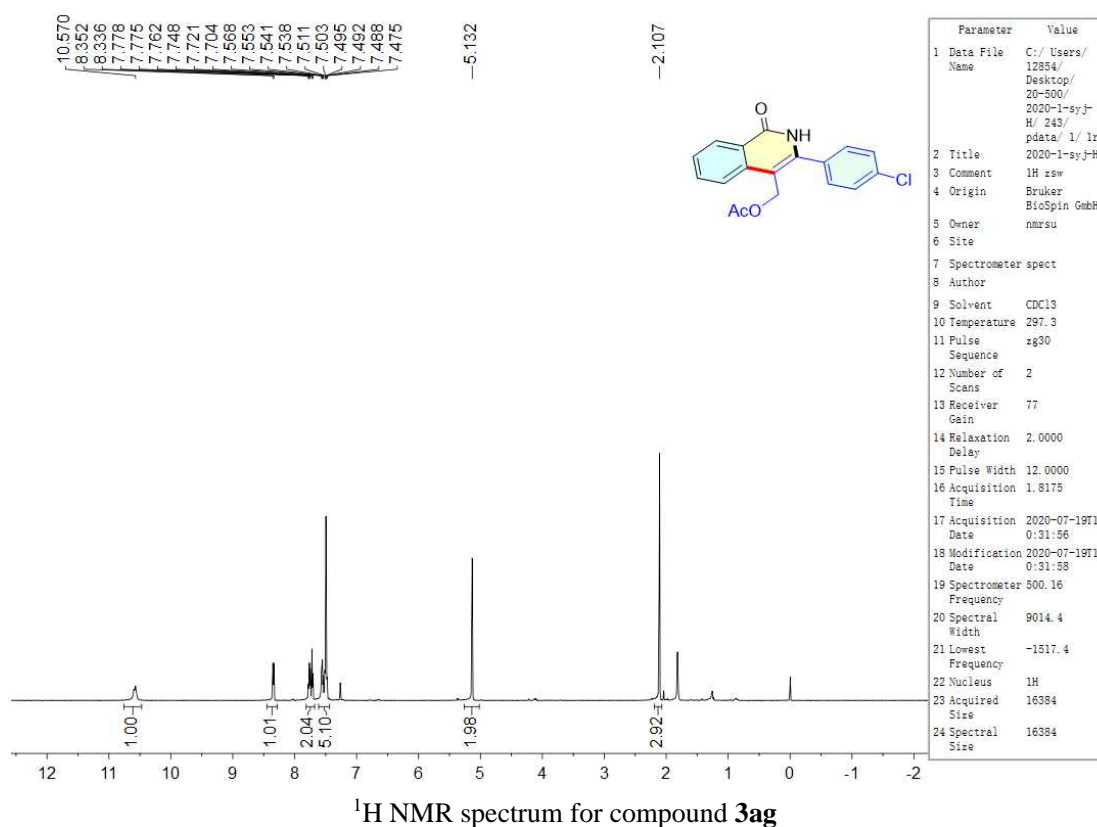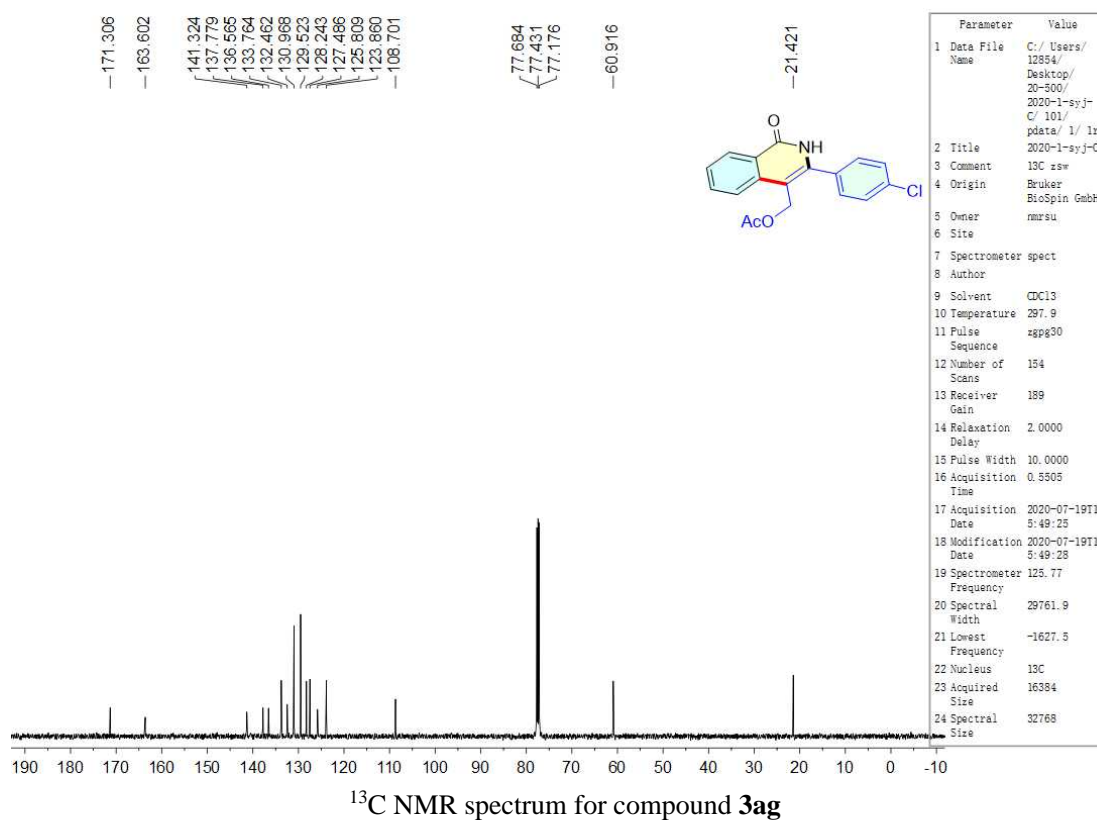





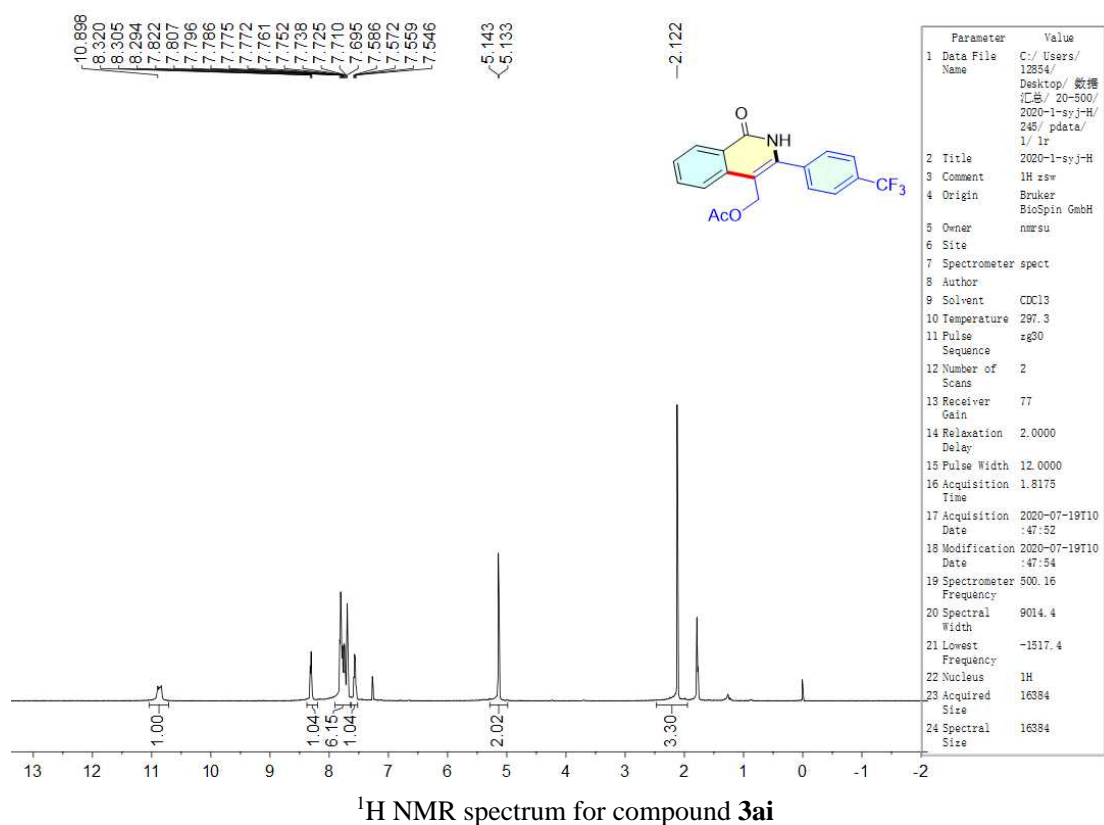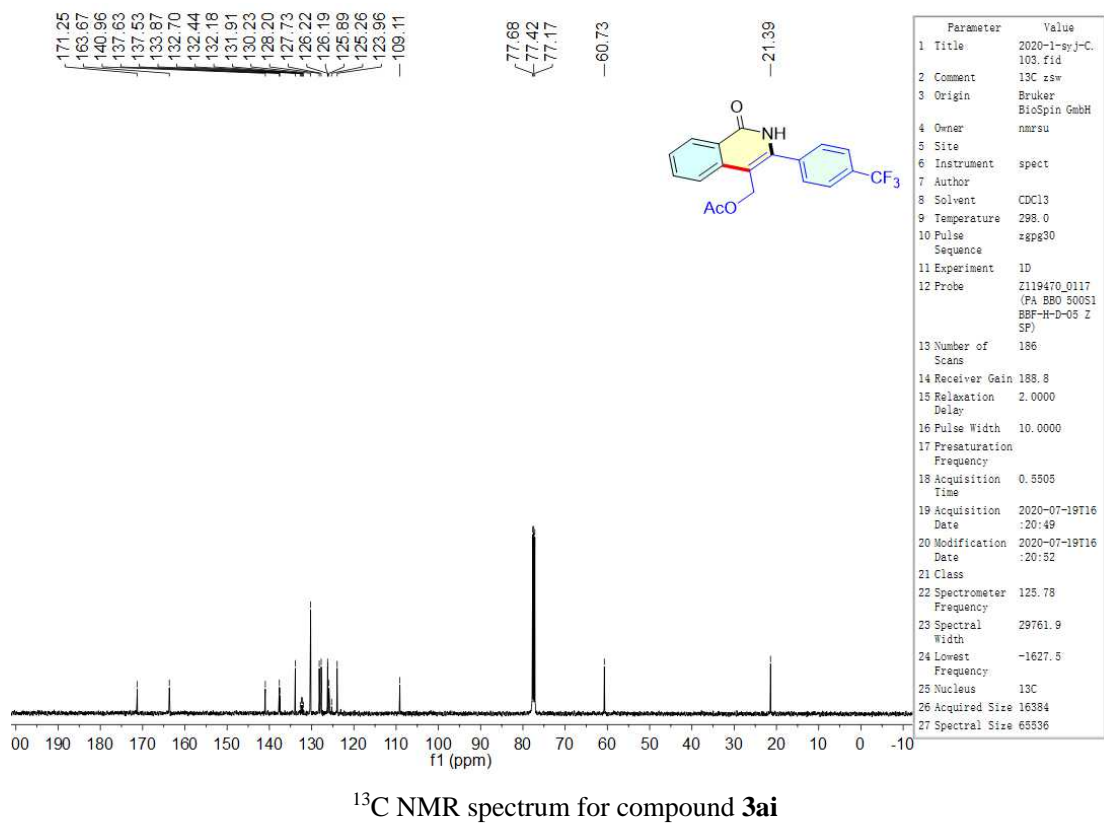

## 2. X-ray crystal data of compound **3aa**

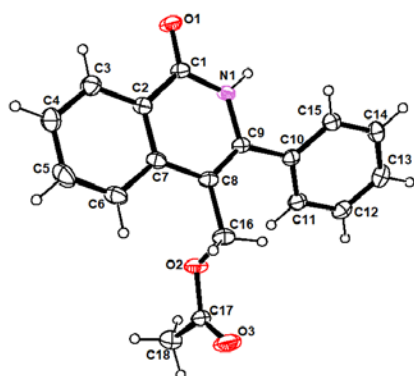

The purified compound **3aa** is dissolved in a mixed solvent of ethyl acetate and n-Hexane, and placed in a dark cabinet to slowly evaporate. After several days, a colourless bulk crystal was obtained. The X-ray crystal-structure determinations were obtained on a Bruker Smart CCD APEX-2 diffractometer (graphite-monochromated Mo  $K\alpha$  radiation,  $\lambda=0.71073$  nm) at 293.15 K.

**Figure S1.** ORTEP drawing of compound **3aa** (CCDC 2220211) (30% probability for the thermal ellipsoid).

**Table S1.** Crystal data and structure refinement for compound **3aa**

|                                      |                                                                                                                                   |
|--------------------------------------|-----------------------------------------------------------------------------------------------------------------------------------|
| CCDC number                          | 2220211                                                                                                                           |
| Identification code                  | mo_20200722b_0m                                                                                                                   |
| Empirical formula                    | C <sub>18</sub> H <sub>15</sub> N O <sub>3</sub>                                                                                  |
| Formula weight                       | 293.31                                                                                                                            |
| Temperature                          | 300.00 K                                                                                                                          |
| Wavelength                           | 0.71073 Å                                                                                                                         |
| Crystal system                       | monoclinic                                                                                                                        |
| Space group                          | P2 <sub>1</sub> /c                                                                                                                |
| Unit cell dimensions                 | a = 15.2877(12) Å $\alpha = 90^\circ$ .<br>b = 5.3060(4) Å $\beta = 99.569(3)^\circ$ .<br>c = 18.1471(14) Å $\gamma = 90^\circ$ . |
| Volume                               | 1451.55(19) Å <sup>3</sup>                                                                                                        |
| Z                                    | 4                                                                                                                                 |
| Density (calculated)                 | 1.342 g/cm <sup>3</sup>                                                                                                           |
| Absorption coefficient               | 0.092 mm <sup>-1</sup>                                                                                                            |
| F(000)                               | 616.0                                                                                                                             |
| Crystal size                         | 0.15 × 0.11 × 0.1 mm <sup>3</sup>                                                                                                 |
| 2 $\theta$ range for data collection | 5.668 to 55.002°.                                                                                                                 |
| Index ranges                         | -19 ≤ h ≤ 19, -6 ≤ k ≤ 6, -23 ≤ l ≤ 23                                                                                            |
| Reflections collected                | 32608                                                                                                                             |
| Independent reflections              | 3312 [R(int) = 0.0848, R(sigma) = 0.0381]                                                                                         |
| Data/restraints/parameters           | 3312/0/200                                                                                                                        |
| Goodness-of-fit on F <sup>2</sup>    | 1.031                                                                                                                             |
| Final R indices [I > 2sigma(I)]      | R1 = 0.0501, wR2 = 0.1091                                                                                                         |
| Final R indices (all data)           | R1 = 0.0907, wR2 = 0.1278                                                                                                         |
| Largest diff. peak and hole          | 0.18 and -0.23 e.Å <sup>-3</sup>                                                                                                  |
